# Supplementary material for: Northern shrimp Pandalus borealis population collapse linked to climate-driven shifts in predator distribution
Source: PLoS One. 2021 Jul 21;16(7):e0253914. doi: 10.1371/journal.pone.0253914 (PMC8294506; doi:10.1371/journal.pone.0253914)
Supplement: S6 Fig — (CSV) [file pone.0253914.s008.csv]

Data for Fig 7, biomass indices for predators of northern shrimp
Survey biomass indices							Standardized biomass indices for predators of northern shrimp
year	survey	svspp	comname	kg_tow				2003	2004	2005	2006	2007	2008	2009	2010	2011	2012	2013	2014	2015	2016	2017
2003	Fall offshore	15	SPINY DOGFISH	37.411			Fall offshore
2004	Fall offshore	15	SPINY DOGFISH	46.2659			ACADIAN REDFISH	0.876137503	0	0.057388804	0.14704328	0.327347371	0.448114725	0.409710477	1	0.691237364	0.687350146	0.098681348	0.22131285	0.090374659	0.243864263	0.145740637
2005	Fall offshore	15	SPINY DOGFISH	110.9301			AMERICAN PLAICE	0.183258779	0	0.000826435	0.169379911	0.098122811	0.323818394	0.028059451	0.052472091	0.346788052	0.088704071	0.146344663	0.425719196	0.78071913	1	0.441952284
2006	Fall offshore	15	SPINY DOGFISH	158.1492			ATLANTIC COD	0.844253237	0.61214609	0.369013788	0.695071571	0.335359436	0.917627092	1	0.241658773	0.266827176	0.070479423	0.014314283	0.251934007	0	0.667127145	0.291825801
2007	Fall offshore	15	SPINY DOGFISH	141.1922			ATLANTIC HALIBUT	0.048879578	0.152224973	0.123087666	0	0.096806957	0.084491843	0.177553482	0.212023107	0.175839523	0.192725195	0.080936964	0.405192662	1	0.056878055	0.051628351
2008	Fall offshore	15	SPINY DOGFISH	43.3648			ATLANTIC HERRING	0.405219573	0.403606275	0.170583638	0.231073933	0.123982465	0.208980805	0.055680587	0	0.098042241	0.147682184	0.274334473	0.494849856	0.38646037	1	0.336110081
2009	Fall offshore	15	SPINY DOGFISH	127.1601			ATLANTIC MACKEREL	0	0.001322812	0.0035351	0.00125439	0.000364914	0.011107057	0.048966838	0.249920175	0.034643981	1	0.031679059	0.117684623	0.2445377	0.366852164	0.203081732
2010	Fall offshore	15	SPINY DOGFISH	54.5325			FOURSPOT FLOUNDER	0.083264498	0	0	0.055739044	0.068125498	0.126617088	0.529864986	0.390861444	0.748692344	0.300715583	0.357142763	0.934489157	0.636526119	0.270437584	1
2011	Fall offshore	15	SPINY DOGFISH	82.2515			GOOSEFISH	1	0.05871223	0.273780173	0.630353764	0.550427154	0.157215756	0	0.149934063	0.27486956	0.224815091	0.153488905	0.216329339	0.199071154	0.762972307	0.771707073
2012	Fall offshore	15	SPINY DOGFISH	46.4412			HADDOCK	0.029323418	0.17063405	0.082268387	0.075149358	0.016662845	0.006321564	0.061332463	0	0.055053264	0.10890784	0.279224566	0.49995182	0.544503479	1	0.418621624
2013	Fall offshore	15	SPINY DOGFISH	70.8098			LITTLE SKATE	0	0.025500503	0.052343138	0	0	0.238675763	0.23755732	1	0.015322671	0.042165306	0.015434515	0.03579018	0.034112515	0.019013533	0.053295617
2014	Fall offshore	15	SPINY DOGFISH	29.5205			LONGFIN SQUID	0.032760687	0	0.04155014	0.491143961	0.199893461	0.04381409	0.556798508	0.344120389	0.22439739	1	0.071647357	0.143827407	0.151684645	0.310427487	0.065839873
2015	Fall offshore	15	SPINY DOGFISH	18.8204			LONGHORN SCULPIN	0.152950531	0.032032714	0.014710058	0.065485318	0	1	0.261004146	0.077639575	0.029022548	0.065314932	0.137360141	0.129465553	0.030470835	0.105441018	0.060272158
2016	Fall offshore	15	SPINY DOGFISH	203.3951			POLLOCK	0.139720994	0.098930307	1	0.294706724	0.10306965	0.249268353	0	0.520184745	0.413927075	0.059025584	0.030522211	0.026593466	0.091283414	0.176365076	0.007777608
2017	Fall offshore	15	SPINY DOGFISH	315.0185			RED HAKE	0.387163561	0.082633876	0	0.164610262	0.264562699	0.239745957	0.219083991	0.2372419	0.280188574	0.346021487	0.38358234	0.909028594	1	0.814629847	0.922490133
2003	Fall offshore	23	WINTER SKATE	0.0427			SEA RAVEN	0.418794663	0.114823734	0.663191597	0.665165434	0.259093289	1	0.581546513	0.235945562	0.203108089	0.307183141	0.122719082	0.118233089	0.181934199	0.049507666	0
2004	Fall offshore	23	WINTER SKATE	0.2263			SILVER HAKE	0.250465549	0.084574096	0	0.161337075	0.228018066	0.187079215	0.275154411	0.557332086	0.537332423	1	0.8354104	0.908507967	0.784650775	0.87313043	0.914489865
2005	Fall offshore	23	WINTER SKATE	0.0676			SMOOTH SKATE	0.541870937	0.379384707	0.18049856	0.598659812	0.209018083	0	0.349864499	0.376632823	0.425166047	0.290824083	0.21940019	0.617422656	0.441552264	0.468445674	1
2006	Fall offshore	23	WINTER SKATE	0.0355			SPINY DOGFISH	0.076950172	0.113602355	0.381260275	0.576709473	0.506521095	0.101594128	0.448439456	0.147819449	0.262553875	0.114327957	0.215194414	0.044289831	0	0.763991207	1
2007	Fall offshore	23	WINTER SKATE	0.2373			THORNY SKATE	0.829429302	0.64677385	0.149701874	1	0.219974446	0.148158007	0.253353918	0.36701448	0.063405026	0.000479131	0	0.136126491	0.168973595	0.081079642	0.20519968
2008	Fall offshore	23	WINTER SKATE	1.014			WHITE HAKE	0.47024493	0.182556302	0.090096054	0.307696465	0.720619824	0.396360492	0.073154915	0.612326232	1	0.378135934	0	0.084975885	0.121397982	0.200659272	0.270430027
2009	Fall offshore	23	WINTER SKATE	5.3824			WINDOWPANE	0.044128646	0.019446522	0.02617801	0.016454749	0	0.255796559	0.146596859	1	0.415856395	0.411368736	0.183994016	0.242333583	0.019446522	0.064323111	0.013450755
2010	Fall offshore	23	WINTER SKATE	1.136			WINTER SKATE	0.00490123	0.03911666	0.009541558	0.003559448	0.041166605	0.185911293	1	0.208647037	0.002553112	0.160808796	0.081680954	0.070834886	0	0.045396944	0.096948224
2011	Fall offshore	23	WINTER SKATE	0.0301			Spring inshore
2012	Fall offshore	23	WINTER SKATE	0.8793			ACADIAN REDFISH	0.537621286	0.161976187	0.448231168	0.133321963	0.211248436	0.890536635	1	0.344200507	0.806239334	0.293305787	0.298650896	0.11433406	0	0.219905448	0.141392602
2013	Fall offshore	23	WINTER SKATE	0.4547			AMERICAN PLAICE	0.602513496	0.501838557	0.443863365	0.179934224	0.680051962	0.777131076	1	0.643617912	0.223940175	0.119916642	0.042674765	0.330378413	0	0.341368854	0.03664242
2014	Fall offshore	23	WINTER SKATE	0.3965			ATLANTIC COD	0.257244914	0.179349111	0.995934225	0.318380156	0.330424774	0.687597891	1	0.651137249	0.225689076	0.228153327	0.036005771	0.123342758	0	0.045174178	0.413902549
2015	Fall offshore	23	WINTER SKATE	0.0164			ATLANTIC HALIBUT	0	0.123554844	0.013594262	0.699604325	0.260025479	0.634616704	0.181163258	0.206681508	0.373425149	1	0.212058538	0.345452618	0.161857115	0.42326051	0.027811859
2016	Fall offshore	23	WINTER SKATE	0.26			ATLANTIC HERRING	0.30626878	0.433908204	0.062484926	0.372922802	0.314550971	0.010164466	0.268525591	0.293220022	0.233546962	0.166919871	0.288598747	0.097144659	1	0	0.093113482
2017	Fall offshore	23	WINTER SKATE	1.1668			ATLANTIC MACKEREL	0	0	0	0	0	0.053207145	0	0.048314628	1	0.334731434	0.323317772	0.022565979	0.015938808	0.031305786	0.050640829
2003	Fall offshore	26	LITTLE SKATE	0			FOURSPOT FLOUNDER	1	0.081015672	0	0.055098124	0.083707615	0.012997562	0.120105523	0.271960893	0.250132421	0.297865467	0.340827965	0.286050641	0.175859803	0.463821623	0.039281048
2004	Fall offshore	26	LITTLE SKATE	0.0228			GOOSEFISH	0.81504557	0.403635256	1	0.060198518	0.474244322	0.606861973	0.159304575	0.020884179	0.081589739	0.283032497	0.133585505	0	0.035255597	0.540524055	0.291953899
2005	Fall offshore	26	LITTLE SKATE	0.0468			HADDOCK	0.160139851	0.062675816	0.061796718	0.09594848	0.133117612	0.160977934	0.00703541	0.041703387	0.062411989	0	0.051962708	0.627423961	0.207998286	0.590771148	1
2006	Fall offshore	26	LITTLE SKATE	0			LITTLE SKATE	0.808164834	1	0.292399752	0.19547186	0.310423806	0.32356933	0.682792127	0.387460488	0.303264092	0.170889063	0.124322396	0.217920115	0	0.044132039	0.026591949
2007	Fall offshore	26	LITTLE SKATE	0			LONGFIN SQUID	0.016520292	0	0	0.02508034	0.087268283	0	0.019624609	0.003798203	0.175557048	1	0.347845789	0.46290167	0.209189752	0.283188849	0.153148421
2008	Fall offshore	26	LITTLE SKATE	0.2134			LONGHORN SCULPIN	0.716978085	1	0.740469642	0.213430455	0.26627046	0.400513343	0.598734453	0.182894444	0.166165906	0	0.018888958	0.464327096	0.135561064	0.028729847	0.002056838
2009	Fall offshore	26	LITTLE SKATE	0.2124			POLLOCK	0.047917967	0.187408494	0	0.234858668	0.121006505	0.3239166	0.381241594	0.231636694	0.076848063	0.084282551	0.02383715	0.075903843	0.034869401	1	0.302235866
2010	Fall offshore	26	LITTLE SKATE	0.8941			RED HAKE	0.891389134	0.317205645	0.65855665	0	0.288641368	0.442298335	0.659961522	0.372782085	0.224613887	0.400462192	0.234878778	0.693251005	0.289246057	1	0.297330987
2011	Fall offshore	26	LITTLE SKATE	0.0137			SEA RAVEN	0.853930262	0.806399147	1	0.414281629	0.555338894	0.6183944	0.513302027	0.362403071	0.261828908	0.196812235	0.068842139	0.1232125	0.045479453	0.087468389	0
2012	Fall offshore	26	LITTLE SKATE	0.0377			SILVER HAKE	0.309987562	0.139208236	0.012940716	0	0.133508746	0.097812973	0.219476705	0.370681531	0.248312066	0.630368596	0.498915821	1	0.200467818	0.854115484	0.601499074
2013	Fall offshore	26	LITTLE SKATE	0.0138			SMOOTH SKATE	0.254451916	0.340705193	0.669874953	0.125494128	0.325132941	1	0.126400256	0.064443176	0.416799588	0.400573488	0	0.341579521	0.297293231	0.161153344	0.012826567
2014	Fall offshore	26	LITTLE SKATE	0.032			SPINY DOGFISH	0	0	0	0.179276526	0.058269853	0.002330795	0.015295838	0	0.109597435	0.221850898	1	0	0	0.701908938	0.446978332
2015	Fall offshore	26	LITTLE SKATE	0.0305			THORNY SKATE	0.124952604	0.716454017	1	0.15616295	0.195010267	0.844245695	0	0.470520559	0.02424678	0.027327658	0.207099526	0.267904191	0.132500239	0.052484749	0.120495138
2016	Fall offshore	26	LITTLE SKATE	0.017			WHITE HAKE	0.193417426	0.163911119	0.430923166	0.349477565	0.284535949	0.658623923	0.887544685	0.171543079	0.314799976	0.440601138	0	0.384989889	0.246848101	1	0.070896836
2017	Fall offshore	26	LITTLE SKATE	0.42			WINDOWPANE	0.38175086	0.678164477	0.353013049	0.331325449	0.404226354	0.840919716	0.512303965	0.301228801	0.241498887	1	0.131310966	0.412115234	0	0.160951936	0.011615085
2003	Fall offshore	27	SMOOTH SKATE	0.4486			WINTER SKATE	1	0	0	0.312235321	0.114192785	0	0.20762337	0.114344745	0.055560415	0	0.011436934	0	0	0.005027202	0
2004	Fall offshore	27	SMOOTH SKATE	0.3187			Spring offshore
2005	Fall offshore	27	SMOOTH SKATE	0.1597			ACADIAN REDFISH	0.557550758	0.792860656	0.708305942	0	0.419723362	0.477579637	0.103221928	0.574826997	0.642716508	0.821677019	0.17231695	0.684357991	0.27650097	1	0.49452966
2006	Fall offshore	27	SMOOTH SKATE	0.494			AMERICAN PLAICE	0.202978474	0.322303922	0.001758312	0.084212489	0.261828645	0.391970375	0.072223998	0.184676044	0.099770887	0.125452899	0	0.598278986	0.283514493	1	0.786551577
2007	Fall offshore	27	SMOOTH SKATE	0.1825			ATLANTIC COD	1	0.031085456	0.093150502	0.085316454	0.899684075	0.68451522	0.127183476	0.31983641	0.048798427	0.041933884	0.003265115	0	0.43990461	0.144199963	0.240080681
2008	Fall offshore	27	SMOOTH SKATE	0.0154			ATLANTIC HALIBUT	0.050302052	0.23272923	0	0.461032358	0.163945212	0.121418745	0.007297087	0.177402955	0.091931336	0.174711406	0.073628806	0.263951193	0.263472696	1	0.078712842
2009	Fall offshore	27	SMOOTH SKATE	0.2951			ATLANTIC HERRING	0.082627759	0.668606995	0	0.017412559	0.099284346	0.141593589	0.152882774	0.123853442	0.137687733	0.682164096	0.434910795	0.1847848	0.1440127	1	0.512523939
2010	Fall offshore	27	SMOOTH SKATE	0.3165			ATLANTIC MACKEREL	0	0	0	0	0.033079889	0.000225217	0.006035819	0.007990703	0.018720046	0.026260315	0.327303521	0.005576376	0.207460992	0.066736334	1
2011	Fall offshore	27	SMOOTH SKATE	0.3553			FOURSPOT FLOUNDER	1	0.395951929	0	0.6628716	0.616698292	0.460468058	0.270714738	0.252371917	0.742567995	0.289057559	0.251739405	0.163187856	0.495256167	0.001897533	0.635041113
2012	Fall offshore	27	SMOOTH SKATE	0.2479			GOOSEFISH	1	0.451027811	0.50870091	0.177330319	0.752904684	0.845749435	0.097103202	0.098259818	0.190736554	0.176383997	0	0.029493717	0.054571263	0.303611797	0.274486094
2013	Fall offshore	27	SMOOTH SKATE	0.1908			HADDOCK	0.045934679	0	0.013703061	0.010729148	0.000667109	0.000604965	0.016827467	0.115269831	0.013128044	0.018886445	0.058875543	0.059464785	1	0.425001535	0.594830542
2014	Fall offshore	27	SMOOTH SKATE	0.509			LITTLE SKATE	0.244664237	0	0.182717335	0.048672566	0.632222801	0.110619469	0.578084331	1	0.103071317	0.239718896	0.052056221	0.01405518	0.133263925	0.055700156	0.017699115
2015	Fall offshore	27	SMOOTH SKATE	0.3684			LONGFIN SQUID	0.001425517	0	0.002138275	0.000712758	0.156094084	0	0.002138275	0.001425517	0.055595153	0.173913043	1	0.012116892	0	0.021382751	0.17106201
2016	Fall offshore	27	SMOOTH SKATE	0.3899			LONGHORN SCULPIN	0.231348372	0.020427297	0.134297403	0.064747997	1	0.387806125	0.083357009	0.679129496	0.512131371	0.042928575	0.093385988	0	0.079663617	0.063497926	0.086368544
2017	Fall offshore	27	SMOOTH SKATE	3.6257			POLLOCK	0.065512468	0	0.442448867	0.291713859	0.493321108	0.551678263	0.060562477	0.086846568	0.749240422	0.195039222	0.152269145	0.001552116	1	0.137533035	0.091946377
2003	Fall offshore	28	THORNY SKATE	1.7921			RED HAKE	0.053726621	0.218831351	0.016680684	0	0.355420722	0.860166607	0.193399816	0.309343586	0.324722656	0.202611238	0.019043614	0.487544555	1	0.812127038	0.912311266
2004	Fall offshore	28	THORNY SKATE	1.449			SEA RAVEN	1	0.179399838	0.860827251	0.121492295	0.443471208	0	0.894403893	0.727818329	0.18783455	0.510948905	0.356042174	0.141281427	0.59675588	0.22676399	0.626439578
2005	Fall offshore	28	THORNY SKATE	0.5153			SILVER HAKE	0.178136546	0.156187416	0.058945114	0	0.122077644	0.168899598	0.176749665	0.36161178	0.516058902	0.676401606	0.489354752	0.804733601	0.606120482	0.573178046	1
2006	Fall offshore	28	THORNY SKATE	2.1125			SMOOTH SKATE	0.388306452	0.454637097	0.894758065	1	0	0.492540323	0.239112903	0.183669355	0.217741935	0.381451613	0.067540323	0.389112903	0.444758065	0.272379032	0.174798387
2007	Fall offshore	28	THORNY SKATE	0.6473			SPINY DOGFISH	0.116661691	0.057127166	0	0.096024793	0.11350238	0.228028527	0.083364154	0.09799992	0.529103317	0.611535051	0.38868218	0.186837168	0.001531754	1	0.21015547
2008	Fall offshore	28	THORNY SKATE	0.5124			THORNY SKATE	1	0.376691873	0.333354515	0.15784457	0.719323886	0.190061638	0.109995552	0.185804156	0.29287666	0.16826587	0	0.246044354	0.362330813	0.138717672	0.150028595
2009	Fall offshore	28	THORNY SKATE	0.71			WHITE HAKE	0.454761681	0	1	0.113479173	0.751635214	0.977529496	0.278033361	0.810158671	0.795042719	0.482333427	0.120833725	0.136043564	0.057678465	0.532062717	0.498763809
2010	Fall offshore	28	THORNY SKATE	0.9235			WINDOWPANE	0.418079096	0.214689266	0.649717514	0.875706215	1	0.740112994	0.443502825	0.40960452	0.141242938	0.505649718	0.358757062	0.163841808	0.141242938	0	0.025423729
2011	Fall offshore	28	THORNY SKATE	0.3532			WINTER SKATE	1	0.970683073	0.024980542	0.13453912	0.075645825	0.021793114	0.758163152	0.205663245	0.152514733	0.150142693	0.012935028	0	0.029094548	0.000704199	0.013713354
2012	Fall offshore	28	THORNY SKATE	0.235			Summer offshore
2013	Fall offshore	28	THORNY SKATE	0.2341			ACADIAN REDFISH	0.468367686	1	0.470402545	0.881613734	0.381918652	0.569346978	0.526767855	0.301310168	0.346525984	0.308250377	0.244399028	0.426775323	0	0.186386451	0.146335566
2014	Fall offshore	28	THORNY SKATE	0.4898			AMERICAN PLAICE	0.209466229	0.068932168	0.20852227	0.144402555	0.186706973	0.245197681	0.096196946	0.1214464	0	0.076339061	0.224598528	0.345888567	0.509349827	1	0.565825211
2015	Fall offshore	28	THORNY SKATE	0.5515			ATLANTIC COD	0.341189762	0.321983716	0.388211461	0.428883089	1	0.503954186	0.237718649	0.130682925	0.156453309	0.110113366	0.067123768	0	0.152109548	0.107834353	0.003700962
2016	Fall offshore	28	THORNY SKATE	0.3864			ATLANTIC HALIBUT	0	0	0	0	0.151489719	0	0	0.087704574	0	0.691145615	0.337389845	0.628619387	0	0	1
2017	Fall offshore	28	THORNY SKATE	2.2467			ATLANTIC HERRING	1	0.587191385	0.654614195	0.47360944	0.452597812	0.135750702	0.060984132	0.197628458	0.193160337	0.266231311	0.055736954	0.095652174	0.637360371	0.048885834	0
2003	Fall offshore	32	ATLANTIC HERRING	15.8438			ATLANTIC MACKEREL	0	0	0	0	0.109898108	0	0	0.051673945	0	0.002911208	1	0	0	0	0
2004	Fall offshore	32	ATLANTIC HERRING	15.7957			FOURSPOT FLOUNDER	0	0.513157895	0.565789474	0	0	0	0	1	0	0	0	0	0	0	0.605263158
2005	Fall offshore	32	ATLANTIC HERRING	8.8482			GOOSEFISH	1	0.472444921	0.915740799	0.803279465	0.417334764	0.369642068	0.277034278	0.206189634	0.19099173	0.266428887	0.413121015	0.292563601	0	0.562148854	0.525014204
2006	Fall offshore	32	ATLANTIC HERRING	10.6517			HADDOCK	0.047606898	0.019796185	0.002382596	0.032906092	0.078471837	0.052240766	0.001538369	0.00543307	0	0.001151901	0.061399691	0.085619625	0.903371655	1	0.844632217
2007	Fall offshore	32	ATLANTIC HERRING	7.4588			LONGFIN SQUID	0	0	0	0	0.123877917	0.057450628	0	0	0	1	0.043087971	0	0	0.055655296	0
2008	Fall offshore	32	ATLANTIC HERRING	9.993			LONGHORN SCULPIN	0.488284203	0	0	0.824640967	0.343915344	0.04686319	0.575963719	1	0.49281935	0.498866213	0.678760393	0.002267574	0.020408163	0.087679516	0.046107332
2009	Fall offshore	32	ATLANTIC HERRING	5.4224			POLLOCK	0.13304721	0.987124464	0.441474834	1	0.806727607	0.347082102	0	0.322780224	0.214174238	0.156708099	0.019369043	0.077726994	0.036647901	0.182626386	0.144194861
2010	Fall offshore	32	ATLANTIC HERRING	3.7623			RED HAKE	0.259986013	0.142884737	0	0.090125554	0.039451161	0.207499917	0.190954807	0.279128784	0.186039231	0.088280548	0.134752056	0.659206714	0.740793286	1	0.568375129
2011	Fall offshore	32	ATLANTIC HERRING	6.6854			SEA RAVEN	0.884432945	0	0.047003019	0.487279	1	0.350582147	0.510564899	0.514014661	0.081500647	0.202673566	0.156964209	0.059939629	0.127210004	0	0.079344545
2012	Fall offshore	32	ATLANTIC HERRING	8.1654			SILVER HAKE	0.891875519	0.261481844	0.071816152	0	0.194894939	0.180708685	0.053395874	0.314732761	0.249993509	0.664058173	0.33578389	0.336240394	1	0.443006179	0.389190581
2013	Fall offshore	32	ATLANTIC HERRING	11.9415			SMOOTH SKATE	1	0	0.554395732	0.927395036	0.316863837	0.474367896	0.511482255	0.144050104	0.047552772	0.413129204	0.89723962	0.782881002	0.985618186	0.877058687	0.317559731
2014	Fall offshore	32	ATLANTIC HERRING	18.5161			SPINY DOGFISH	0	0.25820349	0.056083764	0.258614211	0.712987804	0.913850608	0.231008538	1	0.1759006	0.430365367	0.227549454	0.40612702	0.227859679	0.561581886	0.439868744
2015	Fall offshore	32	ATLANTIC HERRING	15.2845			THORNY SKATE	1	0	0.384137175	0.191520803	0.464317562	0.22752172	0.114448776	0.188030268	0.242222732	0.125098729	0.029503936	0.060205356	0.17901093	0.206400163	0.068383908
2016	Fall offshore	32	ATLANTIC HERRING	33.577			WHITE HAKE	0.684692526	0.620409965	0.347587512	0.684768212	0.515244402	0.314046042	0.846622517	0.702289499	1	0.600832545	0	0.075307474	0.162358877	0.201122674	0.036644592
2017	Fall offshore	32	ATLANTIC HERRING	26.8804			WINDOWPANE	0	0	0	0	0	0	0	0	0	1	0.466666667	0	0	0	0
2003	Fall offshore	72	SILVER HAKE	7.2227
2004	Fall offshore	72	SILVER HAKE	3.2852
2005	Fall offshore	72	SILVER HAKE	1.2778
2006	Fall offshore	72	SILVER HAKE	5.1072
2007	Fall offshore	72	SILVER HAKE	6.6899
2008	Fall offshore	72	SILVER HAKE	5.7182
2009	Fall offshore	72	SILVER HAKE	7.8087
2010	Fall offshore	72	SILVER HAKE	14.5063
2011	Fall offshore	72	SILVER HAKE	14.0316
2012	Fall offshore	72	SILVER HAKE	25.0132
2013	Fall offshore	72	SILVER HAKE	21.1066
2014	Fall offshore	72	SILVER HAKE	22.8416
2015	Fall offshore	72	SILVER HAKE	19.9018
2016	Fall offshore	72	SILVER HAKE	22.0019
2017	Fall offshore	72	SILVER HAKE	99.9549
2003	Fall offshore	73	ATLANTIC COD	7.7687
2004	Fall offshore	73	ATLANTIC COD	6.0045
2005	Fall offshore	73	ATLANTIC COD	4.1565
2006	Fall offshore	73	ATLANTIC COD	6.6348
2007	Fall offshore	73	ATLANTIC COD	3.9007
2008	Fall offshore	73	ATLANTIC COD	8.3264
2009	Fall offshore	73	ATLANTIC COD	8.9525
2010	Fall offshore	73	ATLANTIC COD	3.1885
2011	Fall offshore	73	ATLANTIC COD	3.3798
2012	Fall offshore	73	ATLANTIC COD	1.8874
2013	Fall offshore	73	ATLANTIC COD	1.4605
2014	Fall offshore	73	ATLANTIC COD	3.2666
2015	Fall offshore	73	ATLANTIC COD	1.3517
2016	Fall offshore	73	ATLANTIC COD	6.4224
2017	Fall offshore	73	ATLANTIC COD	5.6401
2003	Fall offshore	74	HADDOCK	5.0527
2004	Fall offshore	74	HADDOCK	22.0639
2005	Fall offshore	74	HADDOCK	11.4263
2006	Fall offshore	74	HADDOCK	10.5693
2007	Fall offshore	74	HADDOCK	3.5286
2008	Fall offshore	74	HADDOCK	2.2837
2009	Fall offshore	74	HADDOCK	8.906
2010	Fall offshore	74	HADDOCK	1.5227
2011	Fall offshore	74	HADDOCK	8.1501
2012	Fall offshore	74	HADDOCK	14.6332
2013	Fall offshore	74	HADDOCK	35.1362
2014	Fall offshore	74	HADDOCK	61.7077
2015	Fall offshore	74	HADDOCK	67.0709
2016	Fall offshore	74	HADDOCK	121.9043
2017	Fall offshore	74	HADDOCK	77.2862
2003	Fall offshore	75	POLLOCK	2.1062
2004	Fall offshore	75	POLLOCK	1.5445
2005	Fall offshore	75	POLLOCK	13.9525
2006	Fall offshore	75	POLLOCK	4.2404
2007	Fall offshore	75	POLLOCK	1.6015
2008	Fall offshore	75	POLLOCK	3.6147
2009	Fall offshore	75	POLLOCK	0.1822
2010	Fall offshore	75	POLLOCK	7.3453
2011	Fall offshore	75	POLLOCK	5.8821
2012	Fall offshore	75	POLLOCK	0.995
2013	Fall offshore	75	POLLOCK	0.6025
2014	Fall offshore	75	POLLOCK	0.5484
2015	Fall offshore	75	POLLOCK	1.4392
2016	Fall offshore	75	POLLOCK	2.6108
2017	Fall offshore	75	POLLOCK	0.2893
2003	Fall offshore	76	WHITE HAKE	5.868
2004	Fall offshore	76	WHITE HAKE	3.7385
2005	Fall offshore	76	WHITE HAKE	3.0541
2006	Fall offshore	76	WHITE HAKE	4.6648
2007	Fall offshore	76	WHITE HAKE	7.7213
2008	Fall offshore	76	WHITE HAKE	5.3211
2009	Fall offshore	76	WHITE HAKE	2.9287
2010	Fall offshore	76	WHITE HAKE	6.9197
2011	Fall offshore	76	WHITE HAKE	9.7893
2012	Fall offshore	76	WHITE HAKE	5.1862
2013	Fall offshore	76	WHITE HAKE	2.3872
2014	Fall offshore	76	WHITE HAKE	3.0162
2015	Fall offshore	76	WHITE HAKE	3.2858
2016	Fall offshore	76	WHITE HAKE	3.8725
2017	Fall offshore	76	WHITE HAKE	9.1646
2003	Fall offshore	77	RED HAKE	3.8992
2004	Fall offshore	77	RED HAKE	1.7223
2005	Fall offshore	77	RED HAKE	1.1316
2006	Fall offshore	77	RED HAKE	2.3083
2007	Fall offshore	77	RED HAKE	3.0228
2008	Fall offshore	77	RED HAKE	2.8454
2009	Fall offshore	77	RED HAKE	2.6977
2010	Fall offshore	77	RED HAKE	2.8275
2011	Fall offshore	77	RED HAKE	3.1345
2012	Fall offshore	77	RED HAKE	3.6051
2013	Fall offshore	77	RED HAKE	3.8736
2014	Fall offshore	77	RED HAKE	7.6297
2015	Fall offshore	77	RED HAKE	8.28
2016	Fall offshore	77	RED HAKE	6.9549
2017	Fall offshore	77	RED HAKE	23.1777
2003	Fall offshore	101	ATLANTIC HALIBUT	0.2667929
2004	Fall offshore	101	ATLANTIC HALIBUT	0.6016725
2005	Fall offshore	101	ATLANTIC HALIBUT	0.5072562
2006	Fall offshore	101	ATLANTIC HALIBUT	0.1084039
2007	Fall offshore	101	ATLANTIC HALIBUT	0.4220964
2008	Fall offshore	101	ATLANTIC HALIBUT	0.3821906
2009	Fall offshore	101	ATLANTIC HALIBUT	0.6837468
2010	Fall offshore	101	ATLANTIC HALIBUT	0.7954419
2011	Fall offshore	101	ATLANTIC HALIBUT	0.6781929
2012	Fall offshore	101	ATLANTIC HALIBUT	0.7329091
2013	Fall offshore	101	ATLANTIC HALIBUT	0.3706714
2014	Fall offshore	101	ATLANTIC HALIBUT	1.421387
2015	Fall offshore	101	ATLANTIC HALIBUT	3.348796
2016	Fall offshore	101	ATLANTIC HALIBUT	0.2927111
2017	Fall offshore	101	ATLANTIC HALIBUT	0.5671149
2003	Fall offshore	102	AMERICAN PLAICE	3.5944
2004	Fall offshore	102	AMERICAN PLAICE	2.1974
2005	Fall offshore	102	AMERICAN PLAICE	2.2037
2006	Fall offshore	102	AMERICAN PLAICE	3.4886
2007	Fall offshore	102	AMERICAN PLAICE	2.9454
2008	Fall offshore	102	AMERICAN PLAICE	4.6659
2009	Fall offshore	102	AMERICAN PLAICE	2.4113
2010	Fall offshore	102	AMERICAN PLAICE	2.5974
2011	Fall offshore	102	AMERICAN PLAICE	4.841
2012	Fall offshore	102	AMERICAN PLAICE	2.8736
2013	Fall offshore	102	AMERICAN PLAICE	3.313
2014	Fall offshore	102	AMERICAN PLAICE	5.4427
2015	Fall offshore	102	AMERICAN PLAICE	8.1489
2016	Fall offshore	102	AMERICAN PLAICE	9.8205
2017	Fall offshore	102	AMERICAN PLAICE	9.4196
2003	Fall offshore	104	FOURSPOT FLOUNDER	0.0121
2004	Fall offshore	104	FOURSPOT FLOUNDER	0
2005	Fall offshore	104	FOURSPOT FLOUNDER	0
2006	Fall offshore	104	FOURSPOT FLOUNDER	0.0081
2007	Fall offshore	104	FOURSPOT FLOUNDER	0.0099
2008	Fall offshore	104	FOURSPOT FLOUNDER	0.0184
2009	Fall offshore	104	FOURSPOT FLOUNDER	0.077
2010	Fall offshore	104	FOURSPOT FLOUNDER	0.0568
2011	Fall offshore	104	FOURSPOT FLOUNDER	0.1088
2012	Fall offshore	104	FOURSPOT FLOUNDER	0.0437
2013	Fall offshore	104	FOURSPOT FLOUNDER	0.0519
2014	Fall offshore	104	FOURSPOT FLOUNDER	0.1358
2015	Fall offshore	104	FOURSPOT FLOUNDER	0.0925
2016	Fall offshore	104	FOURSPOT FLOUNDER	0.0393
2017	Fall offshore	104	FOURSPOT FLOUNDER	0.3126
2003	Fall offshore	108	WINDOWPANE	0.0071
2004	Fall offshore	108	WINDOWPANE	0.0038
2005	Fall offshore	108	WINDOWPANE	0.0047
2006	Fall offshore	108	WINDOWPANE	0.0034
2007	Fall offshore	108	WINDOWPANE	0.0012
2008	Fall offshore	108	WINDOWPANE	0.0354
2009	Fall offshore	108	WINDOWPANE	0.0208
2010	Fall offshore	108	WINDOWPANE	0.1349
2011	Fall offshore	108	WINDOWPANE	0.0568
2012	Fall offshore	108	WINDOWPANE	0.0562
2013	Fall offshore	108	WINDOWPANE	0.0258
2014	Fall offshore	108	WINDOWPANE	0.0336
2015	Fall offshore	108	WINDOWPANE	0.0038
2016	Fall offshore	108	WINDOWPANE	0.0098
2017	Fall offshore	108	WINDOWPANE	0.0057
2003	Fall offshore	121	ATLANTIC MACKEREL	0
2004	Fall offshore	121	ATLANTIC MACKEREL	0.0058
2005	Fall offshore	121	ATLANTIC MACKEREL	0.0155
2006	Fall offshore	121	ATLANTIC MACKEREL	0.0055
2007	Fall offshore	121	ATLANTIC MACKEREL	0.0016
2008	Fall offshore	121	ATLANTIC MACKEREL	0.0487
2009	Fall offshore	121	ATLANTIC MACKEREL	0.2147
2010	Fall offshore	121	ATLANTIC MACKEREL	1.0958
2011	Fall offshore	121	ATLANTIC MACKEREL	0.1519
2012	Fall offshore	121	ATLANTIC MACKEREL	4.3846
2013	Fall offshore	121	ATLANTIC MACKEREL	0.1389
2014	Fall offshore	121	ATLANTIC MACKEREL	0.516
2015	Fall offshore	121	ATLANTIC MACKEREL	1.0722
2016	Fall offshore	121	ATLANTIC MACKEREL	1.6085
2017	Fall offshore	121	ATLANTIC MACKEREL	0.7731
2003	Fall offshore	155	ACADIAN REDFISH	91.3349
2004	Fall offshore	155	ACADIAN REDFISH	21.8699
2005	Fall offshore	155	ACADIAN REDFISH	26.42
2006	Fall offshore	155	ACADIAN REDFISH	33.5283
2007	Fall offshore	155	ACADIAN REDFISH	47.8238
2008	Fall offshore	155	ACADIAN REDFISH	57.3989
2009	Fall offshore	155	ACADIAN REDFISH	54.354
2010	Fall offshore	155	ACADIAN REDFISH	101.1554
2011	Fall offshore	155	ACADIAN REDFISH	76.675
2012	Fall offshore	155	ACADIAN REDFISH	76.3668
2013	Fall offshore	155	ACADIAN REDFISH	29.6939
2014	Fall offshore	155	ACADIAN REDFISH	39.4168
2015	Fall offshore	155	ACADIAN REDFISH	29.0353
2016	Fall offshore	155	ACADIAN REDFISH	41.2048
2017	Fall offshore	155	ACADIAN REDFISH	39.8034
2003	Fall offshore	163	LONGHORN SCULPIN	0.6432
2004	Fall offshore	163	LONGHORN SCULPIN	0.2174
2005	Fall offshore	163	LONGHORN SCULPIN	0.1564
2006	Fall offshore	163	LONGHORN SCULPIN	0.3352
2007	Fall offshore	163	LONGHORN SCULPIN	0.1046
2008	Fall offshore	163	LONGHORN SCULPIN	3.626
2009	Fall offshore	163	LONGHORN SCULPIN	1.0237
2010	Fall offshore	163	LONGHORN SCULPIN	0.378
2011	Fall offshore	163	LONGHORN SCULPIN	0.2068
2012	Fall offshore	163	LONGHORN SCULPIN	0.3346
2013	Fall offshore	163	LONGHORN SCULPIN	0.5883
2014	Fall offshore	163	LONGHORN SCULPIN	0.5605
2015	Fall offshore	163	LONGHORN SCULPIN	0.2119
2016	Fall offshore	163	LONGHORN SCULPIN	0.4759
2017	Fall offshore	163	LONGHORN SCULPIN	0.8779
2003	Fall offshore	164	SEA RAVEN	0.3187
2004	Fall offshore	164	SEA RAVEN	0.1493
2005	Fall offshore	164	SEA RAVEN	0.4549
2006	Fall offshore	164	SEA RAVEN	0.456
2007	Fall offshore	164	SEA RAVEN	0.2297
2008	Fall offshore	164	SEA RAVEN	0.6426
2009	Fall offshore	164	SEA RAVEN	0.4094
2010	Fall offshore	164	SEA RAVEN	0.2168
2011	Fall offshore	164	SEA RAVEN	0.1985
2012	Fall offshore	164	SEA RAVEN	0.2565
2013	Fall offshore	164	SEA RAVEN	0.1537
2014	Fall offshore	164	SEA RAVEN	0.1512
2015	Fall offshore	164	SEA RAVEN	0.1867
2016	Fall offshore	164	SEA RAVEN	0.1129
2017	Fall offshore	164	SEA RAVEN	0.1155
2003	Fall offshore	197	GOOSEFISH	2.3142
2004	Fall offshore	197	GOOSEFISH	0.6725
2005	Fall offshore	197	GOOSEFISH	1.0476
2006	Fall offshore	197	GOOSEFISH	1.6695
2007	Fall offshore	197	GOOSEFISH	1.5301
2008	Fall offshore	197	GOOSEFISH	0.8443
2009	Fall offshore	197	GOOSEFISH	0.5701
2010	Fall offshore	197	GOOSEFISH	0.8316
2011	Fall offshore	197	GOOSEFISH	1.0495
2012	Fall offshore	197	GOOSEFISH	0.9622
2013	Fall offshore	197	GOOSEFISH	0.8378
2014	Fall offshore	197	GOOSEFISH	0.9474
2015	Fall offshore	197	GOOSEFISH	0.9173
2016	Fall offshore	197	GOOSEFISH	1.9008
2017	Fall offshore	197	GOOSEFISH	15.4467
2003	Fall offshore	503	LONGFIN SQUID	0.0557
2004	Fall offshore	503	LONGFIN SQUID	0.0311
2005	Fall offshore	503	LONGFIN SQUID	0.0623
2006	Fall offshore	503	LONGFIN SQUID	0.3999
2007	Fall offshore	503	LONGFIN SQUID	0.1812
2008	Fall offshore	503	LONGFIN SQUID	0.064
2009	Fall offshore	503	LONGFIN SQUID	0.4492
2010	Fall offshore	503	LONGFIN SQUID	0.2895
2011	Fall offshore	503	LONGFIN SQUID	0.1996
2012	Fall offshore	503	LONGFIN SQUID	0.782
2013	Fall offshore	503	LONGFIN SQUID	0.0849
2014	Fall offshore	503	LONGFIN SQUID	0.1391
2015	Fall offshore	503	LONGFIN SQUID	0.145
2016	Fall offshore	503	LONGFIN SQUID	0.2642
2017	Fall offshore	503	LONGFIN SQUID	0.0955
2003	Spring inshore	15	SPINY DOGFISH	0
2004	Spring inshore	15	SPINY DOGFISH	0
2005	Spring inshore	15	SPINY DOGFISH	0
2006	Spring inshore	15	SPINY DOGFISH	0.059520732
2007	Spring inshore	15	SPINY DOGFISH	0.019345892
2008	Spring inshore	15	SPINY DOGFISH	0.000773836
2009	Spring inshore	15	SPINY DOGFISH	0.005078297
2010	Spring inshore	15	SPINY DOGFISH	0
2011	Spring inshore	15	SPINY DOGFISH	0.036386914
2012	Spring inshore	15	SPINY DOGFISH	0.073655643
2013	Spring inshore	15	SPINY DOGFISH	0.332005161
2014	Spring inshore	15	SPINY DOGFISH	0
2015	Spring inshore	15	SPINY DOGFISH	0
2016	Spring inshore	15	SPINY DOGFISH	0.23303739
2017	Spring inshore	15	SPINY DOGFISH	0.148399113
2003	Spring inshore	23	WINTER SKATE	0.349375627
2004	Spring inshore	23	WINTER SKATE	0
2005	Spring inshore	23	WINTER SKATE	0
2006	Spring inshore	23	WINTER SKATE	0.109087411
2007	Spring inshore	23	WINTER SKATE	0.039896176
2008	Spring inshore	23	WINTER SKATE	0
2009	Spring inshore	23	WINTER SKATE	0.072538545
2010	Spring inshore	23	WINTER SKATE	0.039949267
2011	Spring inshore	23	WINTER SKATE	0.019411455
2012	Spring inshore	23	WINTER SKATE	0
2013	Spring inshore	23	WINTER SKATE	0.003995786
2014	Spring inshore	23	WINTER SKATE	0
2015	Spring inshore	23	WINTER SKATE	0
2016	Spring inshore	23	WINTER SKATE	0.001756382
2017	Spring inshore	23	WINTER SKATE	0
2003	Spring inshore	26	LITTLE SKATE	0.325538214
2004	Spring inshore	26	LITTLE SKATE	0.399973987
2005	Spring inshore	26	LITTLE SKATE	0.125411338
2006	Spring inshore	26	LITTLE SKATE	0.087801432
2007	Spring inshore	26	LITTLE SKATE	0.132405021
2008	Spring inshore	26	LITTLE SKATE	0.13750574
2009	Spring inshore	26	LITTLE SKATE	0.276891167
2010	Spring inshore	26	LITTLE SKATE	0.162296751
2011	Spring inshore	26	LITTLE SKATE	0.129626913
2012	Spring inshore	26	LITTLE SKATE	0.078262829
2013	Spring inshore	26	LITTLE SKATE	0.060194057
2014	Spring inshore	26	LITTLE SKATE	0.096511791
2015	Spring inshore	26	LITTLE SKATE	0.011954551
2016	Spring inshore	26	LITTLE SKATE	0.02907864
2017	Spring inshore	26	LITTLE SKATE	0.022272744
2003	Spring inshore	27	SMOOTH SKATE	0.029348628
2004	Spring inshore	27	SMOOTH SKATE	0.035733516
2005	Spring inshore	27	SMOOTH SKATE	0.060100266
2006	Spring inshore	27	SMOOTH SKATE	0.019802544
2007	Spring inshore	27	SMOOTH SKATE	0.034580782
2008	Spring inshore	27	SMOOTH SKATE	0.084537731
2009	Spring inshore	27	SMOOTH SKATE	0.01986962
2010	Spring inshore	27	SMOOTH SKATE	0.015283255
2011	Spring inshore	27	SMOOTH SKATE	0.041366394
2012	Spring inshore	27	SMOOTH SKATE	0.040165259
2013	Spring inshore	27	SMOOTH SKATE	0.010512857
2014	Spring inshore	27	SMOOTH SKATE	0.035798238
2015	Spring inshore	27	SMOOTH SKATE	0.032519951
2016	Spring inshore	27	SMOOTH SKATE	0.022442213
2017	Spring inshore	27	SMOOTH SKATE	0.011462342
2003	Spring inshore	28	THORNY SKATE	0.182856284
2004	Spring inshore	28	THORNY SKATE	0.877149014
2005	Spring inshore	28	THORNY SKATE	1.209969714
2006	Spring inshore	28	THORNY SKATE	0.219490375
2007	Spring inshore	28	THORNY SKATE	0.265088592
2008	Spring inshore	28	THORNY SKATE	1.027148373
2009	Spring inshore	28	THORNY SKATE	0.036189374
2010	Spring inshore	28	THORNY SKATE	0.588477156
2011	Spring inshore	28	THORNY SKATE	0.064649768
2012	Spring inshore	28	THORNY SKATE	0.068266042
2013	Spring inshore	28	THORNY SKATE	0.279278726
2014	Spring inshore	28	THORNY SKATE	0.350650046
2015	Spring inshore	28	THORNY SKATE	0.19171555
2016	Spring inshore	28	THORNY SKATE	0.09779494
2017	Spring inshore	28	THORNY SKATE	0.177624198
2003	Spring inshore	32	ATLANTIC HERRING	8.898428359
2004	Spring inshore	32	ATLANTIC HERRING	11.05728915
2005	Spring inshore	32	ATLANTIC HERRING	4.775130173
2006	Spring inshore	32	ATLANTIC HERRING	10.02579755
2007	Spring inshore	32	ATLANTIC HERRING	9.038511231
2008	Spring inshore	32	ATLANTIC HERRING	3.890195203
2009	Spring inshore	32	ATLANTIC HERRING	8.260049643
2010	Spring inshore	32	ATLANTIC HERRING	8.677724973
2011	Spring inshore	32	ATLANTIC HERRING	7.668429994
2012	Spring inshore	32	ATLANTIC HERRING	6.541516304
2013	Spring inshore	32	ATLANTIC HERRING	8.599561905
2014	Spring inshore	32	ATLANTIC HERRING	5.361356092
2015	Spring inshore	32	ATLANTIC HERRING	20.63202199
2016	Spring inshore	32	ATLANTIC HERRING	3.71827601
2017	Spring inshore	32	ATLANTIC HERRING	5.293173795
2003	Spring inshore	72	SILVER HAKE	9.110804145
2004	Spring inshore	72	SILVER HAKE	4.831681906
2005	Spring inshore	72	SILVER HAKE	1.667867131
2006	Spring inshore	72	SILVER HAKE	1.343618821
2007	Spring inshore	72	SILVER HAKE	4.688872955
2008	Spring inshore	72	SILVER HAKE	3.794463904
2009	Spring inshore	72	SILVER HAKE	6.842924117
2010	Spring inshore	72	SILVER HAKE	10.63157906
2011	Spring inshore	72	SILVER HAKE	7.56543567
2012	Spring inshore	72	SILVER HAKE	17.1384129
2013	Spring inshore	72	SILVER HAKE	13.84467408
2014	Spring inshore	72	SILVER HAKE	26.40006069
2015	Spring inshore	72	SILVER HAKE	6.366629046
2016	Spring inshore	72	SILVER HAKE	22.74471379
2017	Spring inshore	72	SILVER HAKE	16.4150454
2003	Spring inshore	73	ATLANTIC COD	0.51463597
2004	Spring inshore	73	ATLANTIC COD	0.367424347
2005	Spring inshore	73	ATLANTIC COD	1.910650231
2006	Spring inshore	73	ATLANTIC COD	0.630172594
2007	Spring inshore	73	ATLANTIC COD	0.652935153
2008	Spring inshore	73	ATLANTIC COD	1.327939865
2009	Spring inshore	73	ATLANTIC COD	1.918333949
2010	Spring inshore	73	ATLANTIC COD	1.259034609
2011	Spring inshore	73	ATLANTIC COD	0.455000073
2012	Spring inshore	73	ATLANTIC COD	0.459657145
2013	Spring inshore	73	ATLANTIC COD	0.096526497
2014	Spring inshore	73	ATLANTIC COD	0.26158057
2015	Spring inshore	73	ATLANTIC COD	0.02848088
2016	Spring inshore	73	ATLANTIC COD	0.113853439
2017	Spring inshore	73	ATLANTIC COD	0.810695882
2003	Spring inshore	74	HADDOCK	0.37455272
2004	Spring inshore	74	HADDOCK	0.189458088
2005	Spring inshore	74	HADDOCK	0.187788587
2006	Spring inshore	74	HADDOCK	0.252646438
2007	Spring inshore	74	HADDOCK	0.323234596
2008	Spring inshore	74	HADDOCK	0.376144329
2009	Spring inshore	74	HADDOCK	0.083791003
2010	Spring inshore	74	HADDOCK	0.149629201
2011	Spring inshore	74	HADDOCK	0.188957053
2012	Spring inshore	74	HADDOCK	0.070430007
2013	Spring inshore	74	HADDOCK	0.16911275
2014	Spring inshore	74	HADDOCK	1.261975248
2015	Spring inshore	74	HADDOCK	0.46544101
2016	Spring inshore	74	HADDOCK	1.192367634
2017	Spring inshore	74	HADDOCK	1.969537014
2003	Spring inshore	75	POLLOCK	0.012246233
2004	Spring inshore	75	POLLOCK	0.047895356
2005	Spring inshore	75	POLLOCK	0
2006	Spring inshore	75	POLLOCK	0.060022037
2007	Spring inshore	75	POLLOCK	0.030925224
2008	Spring inshore	75	POLLOCK	0.082782272
2009	Spring inshore	75	POLLOCK	0.097432627
2010	Spring inshore	75	POLLOCK	0.059198608
2011	Spring inshore	75	POLLOCK	0.0196398
2012	Spring inshore	75	POLLOCK	0.021539807
2013	Spring inshore	75	POLLOCK	0.00609198
2014	Spring inshore	75	POLLOCK	0.019398489
2015	Spring inshore	75	POLLOCK	0.008911455
2016	Spring inshore	75	POLLOCK	0.255566624
2017	Spring inshore	75	POLLOCK	0.0772414
2003	Spring inshore	76	WHITE HAKE	0.142522587
2004	Spring inshore	76	WHITE HAKE	0.122789982
2005	Spring inshore	76	WHITE HAKE	0.301356663
2006	Spring inshore	76	WHITE HAKE	0.246889193
2007	Spring inshore	76	WHITE HAKE	0.20345891
2008	Spring inshore	76	WHITE HAKE	0.45363357
2009	Spring inshore	76	WHITE HAKE	0.606726366
2010	Spring inshore	76	WHITE HAKE	0.127893923
2011	Spring inshore	76	WHITE HAKE	0.223698247
2012	Spring inshore	76	WHITE HAKE	0.307828893
2013	Spring inshore	76	WHITE HAKE	0.013172963
2014	Spring inshore	76	WHITE HAKE	0.270638376
2015	Spring inshore	76	WHITE HAKE	0.178254826
2016	Spring inshore	76	WHITE HAKE	0.681931858
2017	Spring inshore	76	WHITE HAKE	0.060585853
2003	Spring inshore	77	RED HAKE	0.701140601
2004	Spring inshore	77	RED HAKE	0.292355896
2005	Spring inshore	77	RED HAKE	0.535377635
2006	Spring inshore	77	RED HAKE	0.066524226
2007	Spring inshore	77	RED HAKE	0.272019819
2008	Spring inshore	77	RED HAKE	0.381414497
2009	Spring inshore	77	RED HAKE	0.536377821
2010	Spring inshore	77	RED HAKE	0.331923036
2011	Spring inshore	77	RED HAKE	0.226436037
2012	Spring inshore	77	RED HAKE	0.351629636
2013	Spring inshore	77	RED HAKE	0.233744033
2014	Spring inshore	77	RED HAKE	0.560077965
2015	Spring inshore	77	RED HAKE	0.272450322
2016	Spring inshore	77	RED HAKE	0.778465118
2017	Spring inshore	77	RED HAKE	0.278206314
2003	Spring inshore	101	ATLANTIC HALIBUT	0.170901947
2004	Spring inshore	101	ATLANTIC HALIBUT	0.248660572
2005	Spring inshore	101	ATLANTIC HALIBUT	0.179457428
2006	Spring inshore	101	ATLANTIC HALIBUT	0.611194439
2007	Spring inshore	101	ATLANTIC HALIBUT	0.334547685
2008	Spring inshore	101	ATLANTIC HALIBUT	0.570294804
2009	Spring inshore	101	ATLANTIC HALIBUT	0.28491614
2010	Spring inshore	101	ATLANTIC HALIBUT	0.300975923
2011	Spring inshore	101	ATLANTIC HALIBUT	0.405915202
2012	Spring inshore	101	ATLANTIC HALIBUT	0.800246959
2013	Spring inshore	101	ATLANTIC HALIBUT	0.30435993
2014	Spring inshore	101	ATLANTIC HALIBUT	0.388310829
2015	Spring inshore	101	ATLANTIC HALIBUT	0.272765915
2016	Spring inshore	101	ATLANTIC HALIBUT	0.437278838
2017	Spring inshore	101	ATLANTIC HALIBUT	0.188405202
2003	Spring inshore	102	AMERICAN PLAICE	3.564250188
2004	Spring inshore	102	AMERICAN PLAICE	3.248547979
2005	Spring inshore	102	AMERICAN PLAICE	3.066746069
2006	Spring inshore	102	AMERICAN PLAICE	2.239102031
2007	Spring inshore	102	AMERICAN PLAICE	3.807399728
2008	Spring inshore	102	AMERICAN PLAICE	4.111825945
2009	Spring inshore	102	AMERICAN PLAICE	4.810711014
2010	Spring inshore	102	AMERICAN PLAICE	3.693147759
2011	Spring inshore	102	AMERICAN PLAICE	2.3770984
2012	Spring inshore	102	AMERICAN PLAICE	2.050895477
2013	Spring inshore	102	AMERICAN PLAICE	1.808675998
2014	Spring inshore	102	AMERICAN PLAICE	2.71087349
2015	Spring inshore	102	AMERICAN PLAICE	1.674854039
2016	Spring inshore	102	AMERICAN PLAICE	2.745337941
2017	Spring inshore	102	AMERICAN PLAICE	1.789759427
2003	Spring inshore	104	FOURSPOT FLOUNDER	0.121288483
2004	Spring inshore	104	FOURSPOT FLOUNDER	0.014969418
2005	Spring inshore	104	FOURSPOT FLOUNDER	0.005596559
2006	Spring inshore	104	FOURSPOT FLOUNDER	0.011970967
2007	Spring inshore	104	FOURSPOT FLOUNDER	0.015280854
2008	Spring inshore	104	FOURSPOT FLOUNDER	0.007100272
2009	Spring inshore	104	FOURSPOT FLOUNDER	0.019491798
2010	Spring inshore	104	FOURSPOT FLOUNDER	0.037060238
2011	Spring inshore	104	FOURSPOT FLOUNDER	0.03453486
2012	Spring inshore	104	FOURSPOT FLOUNDER	0.040057188
2013	Spring inshore	104	FOURSPOT FLOUNDER	0.045027602
2014	Spring inshore	104	FOURSPOT FLOUNDER	0.038690308
2015	Spring inshore	104	FOURSPOT FLOUNDER	0.025942118
2016	Spring inshore	104	FOURSPOT FLOUNDER	0.059256975
2017	Spring inshore	104	FOURSPOT FLOUNDER	0.010141059
2003	Spring inshore	108	WINDOWPANE	0.098419518
2004	Spring inshore	108	WINDOWPANE	0.153492537
2005	Spring inshore	108	WINDOWPANE	0.093080094
2006	Spring inshore	108	WINDOWPANE	0.089050584
2007	Spring inshore	108	WINDOWPANE	0.102595417
2008	Spring inshore	108	WINDOWPANE	0.183732114
2009	Spring inshore	108	WINDOWPANE	0.122676007
2010	Spring inshore	108	WINDOWPANE	0.083458691
2011	Spring inshore	108	WINDOWPANE	0.072361
2012	Spring inshore	108	WINDOWPANE	0.213288892
2013	Spring inshore	108	WINDOWPANE	0.051888319
2014	Spring inshore	108	WINDOWPANE	0.104061154
2015	Spring inshore	108	WINDOWPANE	0.027491021
2016	Spring inshore	108	WINDOWPANE	0.057395548
2017	Spring inshore	108	WINDOWPANE	0.029649079
2003	Spring inshore	121	ATLANTIC MACKEREL	0
2004	Spring inshore	121	ATLANTIC MACKEREL	0
2005	Spring inshore	121	ATLANTIC MACKEREL	0
2006	Spring inshore	121	ATLANTIC MACKEREL	0
2007	Spring inshore	121	ATLANTIC MACKEREL	0
2008	Spring inshore	121	ATLANTIC MACKEREL	0.003481176
2009	Spring inshore	121	ATLANTIC MACKEREL	0
2010	Spring inshore	121	ATLANTIC MACKEREL	0.003161074
2011	Spring inshore	121	ATLANTIC MACKEREL	0.065426852
2012	Spring inshore	121	ATLANTIC MACKEREL	0.021900424
2013	Spring inshore	121	ATLANTIC MACKEREL	0.021153664
2014	Spring inshore	121	ATLANTIC MACKEREL	0.001476421
2015	Spring inshore	121	ATLANTIC MACKEREL	0.001042826
2016	Spring inshore	121	ATLANTIC MACKEREL	0.002048239
2017	Spring inshore	121	ATLANTIC MACKEREL	0.00331327
2003	Spring inshore	155	ACADIAN REDFISH	0.33165663
2004	Spring inshore	155	ACADIAN REDFISH	0.116259607
2005	Spring inshore	155	ACADIAN REDFISH	0.280399831
2006	Spring inshore	155	ACADIAN REDFISH	0.099829113
2007	Spring inshore	155	ACADIAN REDFISH	0.144512593
2008	Spring inshore	155	ACADIAN REDFISH	0.534020286
2009	Spring inshore	155	ACADIAN REDFISH	0.596787198
2010	Spring inshore	155	ACADIAN REDFISH	0.220748062
2011	Spring inshore	155	ACADIAN REDFISH	0.485683737
2012	Spring inshore	155	ACADIAN REDFISH	0.191564742
2013	Spring inshore	155	ACADIAN REDFISH	0.194629658
2014	Spring inshore	155	ACADIAN REDFISH	0.088941342
2015	Spring inshore	155	ACADIAN REDFISH	0.023381546
2016	Spring inshore	155	ACADIAN REDFISH	0.149476573
2017	Spring inshore	155	ACADIAN REDFISH	0.104456863
2003	Spring inshore	163	LONGHORN SCULPIN	2.870228742
2004	Spring inshore	163	LONGHORN SCULPIN	3.714208645
2005	Spring inshore	163	LONGHORN SCULPIN	2.940281276
2006	Spring inshore	163	LONGHORN SCULPIN	1.368634492
2007	Spring inshore	163	LONGHORN SCULPIN	1.526204983
2008	Spring inshore	163	LONGHORN SCULPIN	1.926521318
2009	Spring inshore	163	LONGHORN SCULPIN	2.517622659
2010	Spring inshore	163	LONGHORN SCULPIN	1.277575185
2011	Spring inshore	163	LONGHORN SCULPIN	1.227690178
2012	Spring inshore	163	LONGHORN SCULPIN	0.732178426
2013	Spring inshore	163	LONGHORN SCULPIN	0.788505871
2014	Spring inshore	163	LONGHORN SCULPIN	2.116815858
2015	Spring inshore	163	LONGHORN SCULPIN	1.136425615
2016	Spring inshore	163	LONGHORN SCULPIN	0.817851697
2017	Spring inshore	163	LONGHORN SCULPIN	0.73831198
2003	Spring inshore	164	SEA RAVEN	0.421494155
2004	Spring inshore	164	SEA RAVEN	0.398194167
2005	Spring inshore	164	SEA RAVEN	0.493098263
2006	Spring inshore	164	SEA RAVEN	0.20597622
2007	Spring inshore	164	SEA RAVEN	0.275123189
2008	Spring inshore	164	SEA RAVEN	0.30603331
2009	Spring inshore	164	SEA RAVEN	0.254516509
2010	Spring inshore	164	SEA RAVEN	0.180545094
2011	Spring inshore	164	SEA RAVEN	0.131243142
2012	Spring inshore	164	SEA RAVEN	0.099371647
2013	Spring inshore	164	SEA RAVEN	0.036640073
2014	Spring inshore	164	SEA RAVEN	0.063292693
2015	Spring inshore	164	SEA RAVEN	0.025187569
2016	Spring inshore	164	SEA RAVEN	0.045770753
2017	Spring inshore	164	SEA RAVEN	0.002893316
2003	Spring inshore	197	GOOSEFISH	0.523757847
2004	Spring inshore	197	GOOSEFISH	0.312136983
2005	Spring inshore	197	GOOSEFISH	0.618894539
2006	Spring inshore	197	GOOSEFISH	0.135480305
2007	Spring inshore	197	GOOSEFISH	0.34845681
2008	Spring inshore	197	GOOSEFISH	0.416672557
2009	Spring inshore	197	GOOSEFISH	0.186458389
2010	Spring inshore	197	GOOSEFISH	0.115257831
2011	Spring inshore	197	GOOSEFISH	0.146483502
2012	Spring inshore	197	GOOSEFISH	0.250101445
2013	Spring inshore	197	GOOSEFISH	0.173229037
2014	Spring inshore	197	GOOSEFISH	0.104515446
2015	Spring inshore	197	GOOSEFISH	0.122650188
2016	Spring inshore	197	GOOSEFISH	0.382549719
2017	Spring inshore	197	GOOSEFISH	0.254690428
2003	Spring inshore	503	LONGFIN SQUID	0.001214916
2004	Spring inshore	503	LONGFIN SQUID	0
2005	Spring inshore	503	LONGFIN SQUID	0
2006	Spring inshore	503	LONGFIN SQUID	0.001844429
2007	Spring inshore	503	LONGFIN SQUID	0.006417782
2008	Spring inshore	503	LONGFIN SQUID	0
2009	Spring inshore	503	LONGFIN SQUID	0.00144321
2010	Spring inshore	503	LONGFIN SQUID	0.000279323
2011	Spring inshore	503	LONGFIN SQUID	0.012910611
2012	Spring inshore	503	LONGFIN SQUID	0.07354083
2013	Spring inshore	503	LONGFIN SQUID	0.025580868
2014	Spring inshore	503	LONGFIN SQUID	0.034042173
2015	Spring inshore	503	LONGFIN SQUID	0.015383988
2016	Spring inshore	503	LONGFIN SQUID	0.020825943
2017	Spring inshore	503	LONGFIN SQUID	0.011262662
2003	Spring offshore	15	SPINY DOGFISH	12.8517
2004	Spring offshore	15	SPINY DOGFISH	7.5075
2005	Spring offshore	15	SPINY DOGFISH	2.3794
2006	Spring offshore	15	SPINY DOGFISH	10.9992
2007	Spring offshore	15	SPINY DOGFISH	12.5681
2008	Spring offshore	15	SPINY DOGFISH	22.8487
2009	Spring offshore	15	SPINY DOGFISH	9.8627
2010	Spring offshore	15	SPINY DOGFISH	11.1765
2011	Spring offshore	15	SPINY DOGFISH	49.8751
2012	Spring offshore	15	SPINY DOGFISH	57.2747
2013	Spring offshore	15	SPINY DOGFISH	37.27
2014	Spring offshore	15	SPINY DOGFISH	19.1511
2015	Spring offshore	15	SPINY DOGFISH	2.5169
2016	Spring offshore	15	SPINY DOGFISH	92.1458
2017	Spring offshore	15	SPINY DOGFISH	21.2443
2003	Spring offshore	23	WINTER SKATE	2.7268
2004	Spring offshore	23	WINTER SKATE	2.6477
2005	Spring offshore	23	WINTER SKATE	0.0961
2006	Spring offshore	23	WINTER SKATE	0.3917
2007	Spring offshore	23	WINTER SKATE	0.2328
2008	Spring offshore	23	WINTER SKATE	0.0875
2009	Spring offshore	23	WINTER SKATE	2.0743
2010	Spring offshore	23	WINTER SKATE	0.5836
2011	Spring offshore	23	WINTER SKATE	0.4402
2012	Spring offshore	23	WINTER SKATE	0.4338
2013	Spring offshore	23	WINTER SKATE	0.0636
2014	Spring offshore	23	WINTER SKATE	0.0287
2015	Spring offshore	23	WINTER SKATE	0.1072
2016	Spring offshore	23	WINTER SKATE	0.0306
2017	Spring offshore	23	WINTER SKATE	0.0657
2003	Spring offshore	26	LITTLE SKATE	0.097
2004	Spring offshore	26	LITTLE SKATE	0.003
2005	Spring offshore	26	LITTLE SKATE	0.0732
2006	Spring offshore	26	LITTLE SKATE	0.0217
2007	Spring offshore	26	LITTLE SKATE	0.2459
2008	Spring offshore	26	LITTLE SKATE	0.0455
2009	Spring offshore	26	LITTLE SKATE	0.2251
2010	Spring offshore	26	LITTLE SKATE	0.3872
2011	Spring offshore	26	LITTLE SKATE	0.0426
2012	Spring offshore	26	LITTLE SKATE	0.0951
2013	Spring offshore	26	LITTLE SKATE	0.023
2014	Spring offshore	26	LITTLE SKATE	0.0084
2015	Spring offshore	26	LITTLE SKATE	0.0542
2016	Spring offshore	26	LITTLE SKATE	0.0244
2017	Spring offshore	26	LITTLE SKATE	0.0098
2003	Spring offshore	27	SMOOTH SKATE	0.2816
2004	Spring offshore	27	SMOOTH SKATE	0.3145
2005	Spring offshore	27	SMOOTH SKATE	0.5328
2006	Spring offshore	27	SMOOTH SKATE	0.585
2007	Spring offshore	27	SMOOTH SKATE	0.089
2008	Spring offshore	27	SMOOTH SKATE	0.3333
2009	Spring offshore	27	SMOOTH SKATE	0.2076
2010	Spring offshore	27	SMOOTH SKATE	0.1801
2011	Spring offshore	27	SMOOTH SKATE	0.197
2012	Spring offshore	27	SMOOTH SKATE	0.2782
2013	Spring offshore	27	SMOOTH SKATE	0.1225
2014	Spring offshore	27	SMOOTH SKATE	0.282
2015	Spring offshore	27	SMOOTH SKATE	0.3096
2016	Spring offshore	27	SMOOTH SKATE	0.2241
2017	Spring offshore	27	SMOOTH SKATE	0.1757
2003	Spring offshore	28	THORNY SKATE	1.7219
2004	Spring offshore	28	THORNY SKATE	0.741
2005	Spring offshore	28	THORNY SKATE	0.6728
2006	Spring offshore	28	THORNY SKATE	0.3966
2007	Spring offshore	28	THORNY SKATE	1.2802
2008	Spring offshore	28	THORNY SKATE	0.4473
2009	Spring offshore	28	THORNY SKATE	0.3213
2010	Spring offshore	28	THORNY SKATE	0.4406
2011	Spring offshore	28	THORNY SKATE	0.6091
2012	Spring offshore	28	THORNY SKATE	0.413
2013	Spring offshore	28	THORNY SKATE	0.1482
2014	Spring offshore	28	THORNY SKATE	0.5354
2015	Spring offshore	28	THORNY SKATE	0.7184
2016	Spring offshore	28	THORNY SKATE	0.3665
2017	Spring offshore	28	THORNY SKATE	0.3843
2003	Spring offshore	32	ATLANTIC HERRING	0.3677
2004	Spring offshore	32	ATLANTIC HERRING	2.6931
2005	Spring offshore	32	ATLANTIC HERRING	0.0398
2006	Spring offshore	32	ATLANTIC HERRING	0.1089
2007	Spring offshore	32	ATLANTIC HERRING	0.4338
2008	Spring offshore	32	ATLANTIC HERRING	0.6017
2009	Spring offshore	32	ATLANTIC HERRING	0.6465
2010	Spring offshore	32	ATLANTIC HERRING	0.5313
2011	Spring offshore	32	ATLANTIC HERRING	0.5862
2012	Spring offshore	32	ATLANTIC HERRING	2.7469
2013	Spring offshore	32	ATLANTIC HERRING	1.7657
2014	Spring offshore	32	ATLANTIC HERRING	0.7731
2015	Spring offshore	32	ATLANTIC HERRING	0.6113
2016	Spring offshore	32	ATLANTIC HERRING	4.0082
2017	Spring offshore	32	ATLANTIC HERRING	2.0737
2003	Spring offshore	72	SILVER HAKE	3.8929
2004	Spring offshore	72	SILVER HAKE	3.483
2005	Spring offshore	72	SILVER HAKE	1.667
2006	Spring offshore	72	SILVER HAKE	0.5662
2007	Spring offshore	72	SILVER HAKE	2.846
2008	Spring offshore	72	SILVER HAKE	3.7204
2009	Spring offshore	72	SILVER HAKE	3.867
2010	Spring offshore	72	SILVER HAKE	7.3193
2011	Spring offshore	72	SILVER HAKE	10.2036
2012	Spring offshore	72	SILVER HAKE	13.198
2013	Spring offshore	72	SILVER HAKE	9.7049
2014	Spring offshore	72	SILVER HAKE	15.5946
2015	Spring offshore	72	SILVER HAKE	11.8855
2016	Spring offshore	72	SILVER HAKE	11.2703
2017	Spring offshore	72	SILVER HAKE	19.2412
2003	Spring offshore	73	ATLANTIC COD	19.8216
2004	Spring offshore	73	ATLANTIC COD	2.4322
2005	Spring offshore	73	ATLANTIC COD	3.5461
2006	Spring offshore	73	ATLANTIC COD	3.4055
2007	Spring offshore	73	ATLANTIC COD	18.0212
2008	Spring offshore	73	ATLANTIC COD	14.1595
2009	Spring offshore	73	ATLANTIC COD	4.1569
2010	Spring offshore	73	ATLANTIC COD	7.6145
2011	Spring offshore	73	ATLANTIC COD	2.7501
2012	Spring offshore	73	ATLANTIC COD	2.6269
2013	Spring offshore	73	ATLANTIC COD	1.9329
2014	Spring offshore	73	ATLANTIC COD	1.8743
2015	Spring offshore	73	ATLANTIC COD	9.7694
2016	Spring offshore	73	ATLANTIC COD	4.4623
2017	Spring offshore	73	ATLANTIC COD	6.1831
2003	Spring offshore	74	HADDOCK	7.4428
2004	Spring offshore	74	HADDOCK	1.3077
2005	Spring offshore	74	HADDOCK	3.1379
2006	Spring offshore	74	HADDOCK	2.7407
2007	Spring offshore	74	HADDOCK	1.3968
2008	Spring offshore	74	HADDOCK	1.3885
2009	Spring offshore	74	HADDOCK	3.5552
2010	Spring offshore	74	HADDOCK	16.7033
2011	Spring offshore	74	HADDOCK	3.0611
2012	Spring offshore	74	HADDOCK	3.8302
2013	Spring offshore	74	HADDOCK	9.1712
2014	Spring offshore	74	HADDOCK	9.2499
2015	Spring offshore	74	HADDOCK	134.8691
2016	Spring offshore	74	HADDOCK	58.0715
2017	Spring offshore	74	HADDOCK	80.7541
2003	Spring offshore	75	POLLOCK	1.6467
2004	Spring offshore	75	POLLOCK	0.5535
2005	Spring offshore	75	POLLOCK	7.9366
2006	Spring offshore	75	POLLOCK	5.4213
2007	Spring offshore	75	POLLOCK	8.7855
2008	Spring offshore	75	POLLOCK	9.7593
2009	Spring offshore	75	POLLOCK	1.5641
2010	Spring offshore	75	POLLOCK	2.0027
2011	Spring offshore	75	POLLOCK	13.056
2012	Spring offshore	75	POLLOCK	3.8081
2013	Spring offshore	75	POLLOCK	3.0944
2014	Spring offshore	75	POLLOCK	0.5794
2015	Spring offshore	75	POLLOCK	17.2404
2016	Spring offshore	75	POLLOCK	2.8485
2017	Spring offshore	75	POLLOCK	2.0878
2003	Spring offshore	76	WHITE HAKE	2.1227
2004	Spring offshore	76	WHITE HAKE	0.6696
2005	Spring offshore	76	WHITE HAKE	3.8649
2006	Spring offshore	76	WHITE HAKE	1.0322
2007	Spring offshore	76	WHITE HAKE	3.0713
2008	Spring offshore	76	WHITE HAKE	3.7931
2009	Spring offshore	76	WHITE HAKE	1.558
2010	Spring offshore	76	WHITE HAKE	3.2583
2011	Spring offshore	76	WHITE HAKE	3.21
2012	Spring offshore	76	WHITE HAKE	2.2108
2013	Spring offshore	76	WHITE HAKE	1.0557
2014	Spring offshore	76	WHITE HAKE	1.1043
2015	Spring offshore	76	WHITE HAKE	0.8539
2016	Spring offshore	76	WHITE HAKE	2.3697
2017	Spring offshore	76	WHITE HAKE	2.2633
2003	Spring offshore	77	RED HAKE	1.2534
2004	Spring offshore	77	RED HAKE	2.0779
2005	Spring offshore	77	RED HAKE	1.0684
2006	Spring offshore	77	RED HAKE	0.9851
2007	Spring offshore	77	RED HAKE	2.76
2008	Spring offshore	77	RED HAKE	5.2806
2009	Spring offshore	77	RED HAKE	1.9509
2010	Spring offshore	77	RED HAKE	2.5299
2011	Spring offshore	77	RED HAKE	2.6067
2012	Spring offshore	77	RED HAKE	1.9969
2013	Spring offshore	77	RED HAKE	1.0802
2014	Spring offshore	77	RED HAKE	3.4198
2015	Spring offshore	77	RED HAKE	5.9789
2016	Spring offshore	77	RED HAKE	5.0407
2017	Spring offshore	77	RED HAKE	5.541
2003	Spring offshore	101	ATLANTIC HALIBUT	0.375856
2004	Spring offshore	101	ATLANTIC HALIBUT	1.200576
2005	Spring offshore	101	ATLANTIC HALIBUT	0.1484496
2006	Spring offshore	101	ATLANTIC HALIBUT	2.2326928
2007	Spring offshore	101	ATLANTIC HALIBUT	0.889616
2008	Spring offshore	101	ATLANTIC HALIBUT	0.6973616
2009	Spring offshore	101	ATLANTIC HALIBUT	0.1814384
2010	Spring offshore	101	ATLANTIC HALIBUT	0.950456
2011	Spring offshore	101	ATLANTIC HALIBUT	0.5640544
2012	Spring offshore	101	ATLANTIC HALIBUT	0.938288
2013	Spring offshore	101	ATLANTIC HALIBUT	0.481312
2014	Spring offshore	101	ATLANTIC HALIBUT	1.3417248
2015	Spring offshore	101	ATLANTIC HALIBUT	1.3395616
2016	Spring offshore	101	ATLANTIC HALIBUT	4.6692672
2017	Spring offshore	101	ATLANTIC HALIBUT	0.504296
2003	Spring offshore	102	AMERICAN PLAICE	2.5013
2004	Spring offshore	102	AMERICAN PLAICE	2.9492
2005	Spring offshore	102	AMERICAN PLAICE	1.746
2006	Spring offshore	102	AMERICAN PLAICE	2.0555
2007	Spring offshore	102	AMERICAN PLAICE	2.7222
2008	Spring offshore	102	AMERICAN PLAICE	3.2107
2009	Spring offshore	102	AMERICAN PLAICE	2.0105
2010	Spring offshore	102	AMERICAN PLAICE	2.4326
2011	Spring offshore	102	AMERICAN PLAICE	2.1139
2012	Spring offshore	102	AMERICAN PLAICE	2.2103
2013	Spring offshore	102	AMERICAN PLAICE	1.7394
2014	Spring offshore	102	AMERICAN PLAICE	3.9851
2015	Spring offshore	102	AMERICAN PLAICE	2.8036
2016	Spring offshore	102	AMERICAN PLAICE	5.493
2017	Spring offshore	102	AMERICAN PLAICE	4.6918
2003	Spring offshore	104	FOURSPOT FLOUNDER	0.1756
2004	Spring offshore	104	FOURSPOT FLOUNDER	0.0801
2005	Spring offshore	104	FOURSPOT FLOUNDER	0.0175
2006	Spring offshore	104	FOURSPOT FLOUNDER	0.1223
2007	Spring offshore	104	FOURSPOT FLOUNDER	0.115
2008	Spring offshore	104	FOURSPOT FLOUNDER	0.0903
2009	Spring offshore	104	FOURSPOT FLOUNDER	0.0603
2010	Spring offshore	104	FOURSPOT FLOUNDER	0.0574
2011	Spring offshore	104	FOURSPOT FLOUNDER	0.1349
2012	Spring offshore	104	FOURSPOT FLOUNDER	0.0632
2013	Spring offshore	104	FOURSPOT FLOUNDER	0.0573
2014	Spring offshore	104	FOURSPOT FLOUNDER	0.0433
2015	Spring offshore	104	FOURSPOT FLOUNDER	0.0958
2016	Spring offshore	104	FOURSPOT FLOUNDER	0.0178
2017	Spring offshore	104	FOURSPOT FLOUNDER	0.1179
2003	Spring offshore	108	WINDOWPANE	0.0155
2004	Spring offshore	108	WINDOWPANE	0.0083
2005	Spring offshore	108	WINDOWPANE	0.0237
2006	Spring offshore	108	WINDOWPANE	0.0317
2007	Spring offshore	108	WINDOWPANE	0.0361
2008	Spring offshore	108	WINDOWPANE	0.0269
2009	Spring offshore	108	WINDOWPANE	0.0164
2010	Spring offshore	108	WINDOWPANE	0.0152
2011	Spring offshore	108	WINDOWPANE	0.0057
2012	Spring offshore	108	WINDOWPANE	0.0186
2013	Spring offshore	108	WINDOWPANE	0.0134
2014	Spring offshore	108	WINDOWPANE	0.0065
2015	Spring offshore	108	WINDOWPANE	0.0057
2016	Spring offshore	108	WINDOWPANE	0.0007
2017	Spring offshore	108	WINDOWPANE	0.0016
2003	Spring offshore	121	ATLANTIC MACKEREL	0
2004	Spring offshore	121	ATLANTIC MACKEREL	0
2005	Spring offshore	121	ATLANTIC MACKEREL	0
2006	Spring offshore	121	ATLANTIC MACKEREL	0
2007	Spring offshore	121	ATLANTIC MACKEREL	0.3672
2008	Spring offshore	121	ATLANTIC MACKEREL	0.0025
2009	Spring offshore	121	ATLANTIC MACKEREL	0.067
2010	Spring offshore	121	ATLANTIC MACKEREL	0.0887
2011	Spring offshore	121	ATLANTIC MACKEREL	0.2078
2012	Spring offshore	121	ATLANTIC MACKEREL	0.2915
2013	Spring offshore	121	ATLANTIC MACKEREL	3.6332
2014	Spring offshore	121	ATLANTIC MACKEREL	0.0619
2015	Spring offshore	121	ATLANTIC MACKEREL	2.3029
2016	Spring offshore	121	ATLANTIC MACKEREL	0.7408
2017	Spring offshore	121	ATLANTIC MACKEREL	11.1004
2003	Spring offshore	155	ACADIAN REDFISH	35.6178
2004	Spring offshore	155	ACADIAN REDFISH	49.828
2005	Spring offshore	155	ACADIAN REDFISH	44.7218
2006	Spring offshore	155	ACADIAN REDFISH	1.9477
2007	Spring offshore	155	ACADIAN REDFISH	27.2945
2008	Spring offshore	155	ACADIAN REDFISH	30.7884
2009	Spring offshore	155	ACADIAN REDFISH	8.1812
2010	Spring offshore	155	ACADIAN REDFISH	36.6611
2011	Spring offshore	155	ACADIAN REDFISH	40.7609
2012	Spring offshore	155	ACADIAN REDFISH	51.5682
2013	Spring offshore	155	ACADIAN REDFISH	12.3538
2014	Spring offshore	155	ACADIAN REDFISH	43.2756
2015	Spring offshore	155	ACADIAN REDFISH	18.6454
2016	Spring offshore	155	ACADIAN REDFISH	62.337
2017	Spring offshore	155	ACADIAN REDFISH	31.812
2003	Spring offshore	163	LONGHORN SCULPIN	0.9428
2004	Spring offshore	163	LONGHORN SCULPIN	0.2004
2005	Spring offshore	163	LONGHORN SCULPIN	0.6012
2006	Spring offshore	163	LONGHORN SCULPIN	0.3564
2007	Spring offshore	163	LONGHORN SCULPIN	3.6483
2008	Spring offshore	163	LONGHORN SCULPIN	1.4935
2009	Spring offshore	163	LONGHORN SCULPIN	0.4219
2010	Spring offshore	163	LONGHORN SCULPIN	2.5189
2011	Spring offshore	163	LONGHORN SCULPIN	1.9311
2012	Spring offshore	163	LONGHORN SCULPIN	0.2796
2013	Spring offshore	163	LONGHORN SCULPIN	0.4572
2014	Spring offshore	163	LONGHORN SCULPIN	0.1285
2015	Spring offshore	163	LONGHORN SCULPIN	0.4089
2016	Spring offshore	163	LONGHORN SCULPIN	0.352
2017	Spring offshore	163	LONGHORN SCULPIN	0.4325
2003	Spring offshore	164	SEA RAVEN	0.7786
2004	Spring offshore	164	SEA RAVEN	0.2727
2005	Spring offshore	164	SEA RAVEN	0.6928
2006	Spring offshore	164	SEA RAVEN	0.237
2007	Spring offshore	164	SEA RAVEN	0.4355
2008	Spring offshore	164	SEA RAVEN	0.1621
2009	Spring offshore	164	SEA RAVEN	0.7135
2010	Spring offshore	164	SEA RAVEN	0.6108
2011	Spring offshore	164	SEA RAVEN	0.2779
2012	Spring offshore	164	SEA RAVEN	0.4771
2013	Spring offshore	164	SEA RAVEN	0.3816
2014	Spring offshore	164	SEA RAVEN	0.2492
2015	Spring offshore	164	SEA RAVEN	0.53
2016	Spring offshore	164	SEA RAVEN	0.3019
2017	Spring offshore	164	SEA RAVEN	0.5483
2003	Spring offshore	197	GOOSEFISH	2.2822
2004	Spring offshore	197	GOOSEFISH	1.238
2005	Spring offshore	197	GOOSEFISH	1.3477
2006	Spring offshore	197	GOOSEFISH	0.7174
2007	Spring offshore	197	GOOSEFISH	1.8122
2008	Spring offshore	197	GOOSEFISH	1.9888
2009	Spring offshore	197	GOOSEFISH	0.5648
2010	Spring offshore	197	GOOSEFISH	0.567
2011	Spring offshore	197	GOOSEFISH	0.7429
2012	Spring offshore	197	GOOSEFISH	0.7156
2013	Spring offshore	197	GOOSEFISH	0.3801
2014	Spring offshore	197	GOOSEFISH	0.4362
2015	Spring offshore	197	GOOSEFISH	0.4839
2016	Spring offshore	197	GOOSEFISH	0.9576
2017	Spring offshore	197	GOOSEFISH	0.9022
2003	Spring offshore	503	LONGFIN SQUID	0.0002
2004	Spring offshore	503	LONGFIN SQUID	0
2005	Spring offshore	503	LONGFIN SQUID	0.0003
2006	Spring offshore	503	LONGFIN SQUID	0.0001
2007	Spring offshore	503	LONGFIN SQUID	0.0219
2008	Spring offshore	503	LONGFIN SQUID	0
2009	Spring offshore	503	LONGFIN SQUID	0.0003
2010	Spring offshore	503	LONGFIN SQUID	0.0002
2011	Spring offshore	503	LONGFIN SQUID	0.0078
2012	Spring offshore	503	LONGFIN SQUID	0.0244
2013	Spring offshore	503	LONGFIN SQUID	0.1403
2014	Spring offshore	503	LONGFIN SQUID	0.0017
2015	Spring offshore	503	LONGFIN SQUID	0
2016	Spring offshore	503	LONGFIN SQUID	0.003
2017	Spring offshore	503	LONGFIN SQUID	0.024
2003	Summer offshore	15	SPINY DOGFISH	9.8835
2004	Summer offshore	15	SPINY DOGFISH	27.6117
2005	Summer offshore	15	SPINY DOGFISH	13.7342
2006	Summer offshore	15	SPINY DOGFISH	27.6399
2007	Summer offshore	15	SPINY DOGFISH	58.8371
2008	Summer offshore	15	SPINY DOGFISH	72.6283
2009	Summer offshore	15	SPINY DOGFISH	25.7445
2010	Summer offshore	15	SPINY DOGFISH	78.5433
2011	Summer offshore	15	SPINY DOGFISH	21.9608
2012	Summer offshore	15	SPINY DOGFISH	39.4323
2013	Summer offshore	15	SPINY DOGFISH	25.507
2014	Summer offshore	15	SPINY DOGFISH	37.7681
2015	Summer offshore	15	SPINY DOGFISH	25.5283
2016	Summer offshore	15	SPINY DOGFISH	48.4416
2017	Summer offshore	15	SPINY DOGFISH	40.0848
2003	Summer offshore	27	SMOOTH SKATE	0.5164
2004	Summer offshore	27	SMOOTH SKATE	0.0853
2005	Summer offshore	27	SMOOTH SKATE	0.3243
2006	Summer offshore	27	SMOOTH SKATE	0.4851
2007	Summer offshore	27	SMOOTH SKATE	0.2219
2008	Summer offshore	27	SMOOTH SKATE	0.2898
2009	Summer offshore	27	SMOOTH SKATE	0.3058
2010	Summer offshore	27	SMOOTH SKATE	0.1474
2011	Summer offshore	27	SMOOTH SKATE	0.1058
2012	Summer offshore	27	SMOOTH SKATE	0.2634
2013	Summer offshore	27	SMOOTH SKATE	0.4721
2014	Summer offshore	27	SMOOTH SKATE	0.4228
2015	Summer offshore	27	SMOOTH SKATE	0.5102
2016	Summer offshore	27	SMOOTH SKATE	0.4634
2017	Summer offshore	27	SMOOTH SKATE	0.2222
2003	Summer offshore	28	THORNY SKATE	4.0842
2004	Summer offshore	28	THORNY SKATE	0.1593
2005	Summer offshore	28	THORNY SKATE	1.667
2006	Summer offshore	28	THORNY SKATE	0.911
2007	Summer offshore	28	THORNY SKATE	1.9817
2008	Summer offshore	28	THORNY SKATE	1.0523
2009	Summer offshore	28	THORNY SKATE	0.6085
2010	Summer offshore	28	THORNY SKATE	0.8973
2011	Summer offshore	28	THORNY SKATE	1.11
2012	Summer offshore	28	THORNY SKATE	0.6503
2013	Summer offshore	28	THORNY SKATE	0.2751
2014	Summer offshore	28	THORNY SKATE	0.3956
2015	Summer offshore	28	THORNY SKATE	0.8619
2016	Summer offshore	28	THORNY SKATE	0.9694
2017	Summer offshore	28	THORNY SKATE	0.4277
2003	Summer offshore	32	ATLANTIC HERRING	9.3333
2004	Summer offshore	32	ATLANTIC HERRING	5.7301
2005	Summer offshore	32	ATLANTIC HERRING	6.3186
2006	Summer offshore	32	ATLANTIC HERRING	4.7387
2007	Summer offshore	32	ATLANTIC HERRING	4.5553
2008	Summer offshore	32	ATLANTIC HERRING	1.7897
2009	Summer offshore	32	ATLANTIC HERRING	1.1371
2010	Summer offshore	32	ATLANTIC HERRING	2.3298
2011	Summer offshore	32	ATLANTIC HERRING	2.2908
2012	Summer offshore	32	ATLANTIC HERRING	2.9286
2013	Summer offshore	32	ATLANTIC HERRING	1.0913
2014	Summer offshore	32	ATLANTIC HERRING	1.4397
2015	Summer offshore	32	ATLANTIC HERRING	6.168
2016	Summer offshore	32	ATLANTIC HERRING	1.0315
2017	Summer offshore	32	ATLANTIC HERRING	0.6048
2003	Summer offshore	72	SILVER HAKE	47.2851
2004	Summer offshore	72	SILVER HAKE	18.1478
2005	Summer offshore	72	SILVER HAKE	9.3813
2006	Summer offshore	72	SILVER HAKE	6.0619
2007	Summer offshore	72	SILVER HAKE	15.0701
2008	Summer offshore	72	SILVER HAKE	14.4144
2009	Summer offshore	72	SILVER HAKE	8.5299
2010	Summer offshore	72	SILVER HAKE	20.6091
2011	Summer offshore	72	SILVER HAKE	17.6168
2012	Summer offshore	72	SILVER HAKE	36.7552
2013	Summer offshore	72	SILVER HAKE	21.5821
2014	Summer offshore	72	SILVER HAKE	21.6032
2015	Summer offshore	72	SILVER HAKE	52.2827
2016	Summer offshore	72	SILVER HAKE	26.538
2017	Summer offshore	72	SILVER HAKE	24.0506
2003	Summer offshore	73	ATLANTIC COD	1.8107
2004	Summer offshore	73	ATLANTIC COD	1.7121
2005	Summer offshore	73	ATLANTIC COD	2.0521
2006	Summer offshore	73	ATLANTIC COD	2.2609
2007	Summer offshore	73	ATLANTIC COD	5.1929
2008	Summer offshore	73	ATLANTIC COD	2.6463
2009	Summer offshore	73	ATLANTIC COD	1.2795
2010	Summer offshore	73	ATLANTIC COD	0.73
2011	Summer offshore	73	ATLANTIC COD	0.8623
2012	Summer offshore	73	ATLANTIC COD	0.6244
2013	Summer offshore	73	ATLANTIC COD	0.4037
2014	Summer offshore	73	ATLANTIC COD	0.0591
2015	Summer offshore	73	ATLANTIC COD	0.84
2016	Summer offshore	73	ATLANTIC COD	0.6127
2017	Summer offshore	73	ATLANTIC COD	0.0781
2003	Summer offshore	74	HADDOCK	1.3799
2004	Summer offshore	74	HADDOCK	0.6387
2005	Summer offshore	74	HADDOCK	0.1746
2006	Summer offshore	74	HADDOCK	0.9881
2007	Summer offshore	74	HADDOCK	2.2025
2008	Summer offshore	74	HADDOCK	1.5034
2009	Summer offshore	74	HADDOCK	0.1521
2010	Summer offshore	74	HADDOCK	0.2559
2011	Summer offshore	74	HADDOCK	0.1111
2012	Summer offshore	74	HADDOCK	0.1418
2013	Summer offshore	74	HADDOCK	1.7475
2014	Summer offshore	74	HADDOCK	2.393
2015	Summer offshore	74	HADDOCK	24.1874
2016	Summer offshore	74	HADDOCK	26.7627
2017	Summer offshore	74	HADDOCK	22.6219
2003	Summer offshore	75	POLLOCK	0.6046
2004	Summer offshore	75	POLLOCK	3.6692
2005	Summer offshore	75	POLLOCK	1.7113
2006	Summer offshore	75	POLLOCK	3.7154
2007	Summer offshore	75	POLLOCK	3.0219
2008	Summer offshore	75	POLLOCK	1.3726
2009	Summer offshore	75	POLLOCK	0.1272
2010	Summer offshore	75	POLLOCK	1.2854
2011	Summer offshore	75	POLLOCK	0.8957
2012	Summer offshore	75	POLLOCK	0.6895
2013	Summer offshore	75	POLLOCK	0.1967
2014	Summer offshore	75	POLLOCK	0.4061
2015	Summer offshore	75	POLLOCK	0.2587
2016	Summer offshore	75	POLLOCK	0.7825
2017	Summer offshore	75	POLLOCK	0.6446
2003	Summer offshore	76	WHITE HAKE	10.2908
2004	Summer offshore	76	WHITE HAKE	9.7812
2005	Summer offshore	76	WHITE HAKE	7.6184
2006	Summer offshore	76	WHITE HAKE	10.2914
2007	Summer offshore	76	WHITE HAKE	8.9475
2008	Summer offshore	76	WHITE HAKE	7.3525
2009	Summer offshore	76	WHITE HAKE	11.5745
2010	Summer offshore	76	WHITE HAKE	10.4303
2011	Summer offshore	76	WHITE HAKE	12.7904
2012	Summer offshore	76	WHITE HAKE	9.626
2013	Summer offshore	76	WHITE HAKE	4.8629
2014	Summer offshore	76	WHITE HAKE	5.4599
2015	Summer offshore	76	WHITE HAKE	6.15
2016	Summer offshore	76	WHITE HAKE	6.4573
2017	Summer offshore	76	WHITE HAKE	5.1534
2003	Summer offshore	77	RED HAKE	7.8103
2004	Summer offshore	77	RED HAKE	6.0522
2005	Summer offshore	77	RED HAKE	3.907
2006	Summer offshore	77	RED HAKE	5.2601
2007	Summer offshore	77	RED HAKE	4.4993
2008	Summer offshore	77	RED HAKE	7.0223
2009	Summer offshore	77	RED HAKE	6.7739
2010	Summer offshore	77	RED HAKE	8.0977
2011	Summer offshore	77	RED HAKE	6.7001
2012	Summer offshore	77	RED HAKE	5.2324
2013	Summer offshore	77	RED HAKE	5.9301
2014	Summer offshore	77	RED HAKE	13.804
2015	Summer offshore	77	RED HAKE	15.0289
2016	Summer offshore	77	RED HAKE	18.9205
2017	Summer offshore	77	RED HAKE	12.4403
2003	Summer offshore	101	ATLANTIC HALIBUT	0
2004	Summer offshore	101	ATLANTIC HALIBUT	0
2005	Summer offshore	101	ATLANTIC HALIBUT	0
2006	Summer offshore	101	ATLANTIC HALIBUT	0
2007	Summer offshore	101	ATLANTIC HALIBUT	0.0361
2008	Summer offshore	101	ATLANTIC HALIBUT	0
2009	Summer offshore	101	ATLANTIC HALIBUT	0
2010	Summer offshore	101	ATLANTIC HALIBUT	0.0209
2011	Summer offshore	101	ATLANTIC HALIBUT	0
2012	Summer offshore	101	ATLANTIC HALIBUT	0.1647
2013	Summer offshore	101	ATLANTIC HALIBUT	0.0804
2014	Summer offshore	101	ATLANTIC HALIBUT	0.1498
2015	Summer offshore	101	ATLANTIC HALIBUT	0
2016	Summer offshore	101	ATLANTIC HALIBUT	0
2017	Summer offshore	101	ATLANTIC HALIBUT	0.2383
2003	Summer offshore	102	AMERICAN PLAICE	6.2952
2004	Summer offshore	102	AMERICAN PLAICE	3.8685
2005	Summer offshore	102	AMERICAN PLAICE	6.2789
2006	Summer offshore	102	AMERICAN PLAICE	5.1717
2007	Summer offshore	102	AMERICAN PLAICE	5.9022
2008	Summer offshore	102	AMERICAN PLAICE	6.9122
2009	Summer offshore	102	AMERICAN PLAICE	4.3393
2010	Summer offshore	102	AMERICAN PLAICE	4.7753
2011	Summer offshore	102	AMERICAN PLAICE	2.6782
2012	Summer offshore	102	AMERICAN PLAICE	3.9964
2013	Summer offshore	102	AMERICAN PLAICE	6.5565
2014	Summer offshore	102	AMERICAN PLAICE	8.6509
2015	Summer offshore	102	AMERICAN PLAICE	11.4735
2016	Summer offshore	102	AMERICAN PLAICE	19.9459
2017	Summer offshore	102	AMERICAN PLAICE	12.4487
2003	Summer offshore	104	FOURSPOT FLOUNDER	0
2004	Summer offshore	104	FOURSPOT FLOUNDER	0.0039
2005	Summer offshore	104	FOURSPOT FLOUNDER	0.0043
2006	Summer offshore	104	FOURSPOT FLOUNDER	0
2007	Summer offshore	104	FOURSPOT FLOUNDER	0
2008	Summer offshore	104	FOURSPOT FLOUNDER	0
2009	Summer offshore	104	FOURSPOT FLOUNDER	0
2010	Summer offshore	104	FOURSPOT FLOUNDER	0.0076
2011	Summer offshore	104	FOURSPOT FLOUNDER	0
2012	Summer offshore	104	FOURSPOT FLOUNDER	0
2013	Summer offshore	104	FOURSPOT FLOUNDER	0
2014	Summer offshore	104	FOURSPOT FLOUNDER	0
2015	Summer offshore	104	FOURSPOT FLOUNDER	0
2016	Summer offshore	104	FOURSPOT FLOUNDER	0
2017	Summer offshore	104	FOURSPOT FLOUNDER	0.0046
2003	Summer offshore	108	WINDOWPANE	0
2004	Summer offshore	108	WINDOWPANE	0
2005	Summer offshore	108	WINDOWPANE	0
2006	Summer offshore	108	WINDOWPANE	0
2007	Summer offshore	108	WINDOWPANE	0
2008	Summer offshore	108	WINDOWPANE	0
2009	Summer offshore	108	WINDOWPANE	0
2010	Summer offshore	108	WINDOWPANE	0
2011	Summer offshore	108	WINDOWPANE	0
2012	Summer offshore	108	WINDOWPANE	0.0015
2013	Summer offshore	108	WINDOWPANE	0.0007
2014	Summer offshore	108	WINDOWPANE	0
2015	Summer offshore	108	WINDOWPANE	0
2016	Summer offshore	108	WINDOWPANE	0
2017	Summer offshore	108	WINDOWPANE	0
2003	Summer offshore	121	ATLANTIC MACKEREL	0
2004	Summer offshore	121	ATLANTIC MACKEREL	0
2005	Summer offshore	121	ATLANTIC MACKEREL	0
2006	Summer offshore	121	ATLANTIC MACKEREL	0
2007	Summer offshore	121	ATLANTIC MACKEREL	0.0151
2008	Summer offshore	121	ATLANTIC MACKEREL	0
2009	Summer offshore	121	ATLANTIC MACKEREL	0
2010	Summer offshore	121	ATLANTIC MACKEREL	0.0071
2011	Summer offshore	121	ATLANTIC MACKEREL	0
2012	Summer offshore	121	ATLANTIC MACKEREL	0.0004
2013	Summer offshore	121	ATLANTIC MACKEREL	0.1374
2014	Summer offshore	121	ATLANTIC MACKEREL	0
2015	Summer offshore	121	ATLANTIC MACKEREL	0
2016	Summer offshore	121	ATLANTIC MACKEREL	0
2017	Summer offshore	121	ATLANTIC MACKEREL	0
2003	Summer offshore	155	ACADIAN REDFISH	75.0187
2004	Summer offshore	155	ACADIAN REDFISH	134.8217
2005	Summer offshore	155	ACADIAN REDFISH	75.2476
2006	Summer offshore	155	ACADIAN REDFISH	121.5045
2007	Summer offshore	155	ACADIAN REDFISH	65.2941
2008	Summer offshore	155	ACADIAN REDFISH	86.3778
2009	Summer offshore	155	ACADIAN REDFISH	81.5881
2010	Summer offshore	155	ACADIAN REDFISH	56.2265
2011	Summer offshore	155	ACADIAN REDFISH	61.3128
2012	Summer offshore	155	ACADIAN REDFISH	57.0072
2013	Summer offshore	155	ACADIAN REDFISH	49.8246
2014	Summer offshore	155	ACADIAN REDFISH	70.34
2015	Summer offshore	155	ACADIAN REDFISH	22.3323
2016	Summer offshore	155	ACADIAN REDFISH	43.2988
2017	Summer offshore	155	ACADIAN REDFISH	38.7935
2003	Summer offshore	163	LONGHORN SCULPIN	0.0646
2004	Summer offshore	163	LONGHORN SCULPIN	0
2005	Summer offshore	163	LONGHORN SCULPIN	0
2006	Summer offshore	163	LONGHORN SCULPIN	0.1091
2007	Summer offshore	163	LONGHORN SCULPIN	0.0455
2008	Summer offshore	163	LONGHORN SCULPIN	0.0062
2009	Summer offshore	163	LONGHORN SCULPIN	0.0762
2010	Summer offshore	163	LONGHORN SCULPIN	0.1323
2011	Summer offshore	163	LONGHORN SCULPIN	0.0652
2012	Summer offshore	163	LONGHORN SCULPIN	0.066
2013	Summer offshore	163	LONGHORN SCULPIN	0.0898
2014	Summer offshore	163	LONGHORN SCULPIN	0.0003
2015	Summer offshore	163	LONGHORN SCULPIN	0.0027
2016	Summer offshore	163	LONGHORN SCULPIN	0.0116
2017	Summer offshore	163	LONGHORN SCULPIN	0.0061
2003	Summer offshore	164	SEA RAVEN	0.2051
2004	Summer offshore	164	SEA RAVEN	0
2005	Summer offshore	164	SEA RAVEN	0.0109
2006	Summer offshore	164	SEA RAVEN	0.113
2007	Summer offshore	164	SEA RAVEN	0.2319
2008	Summer offshore	164	SEA RAVEN	0.0813
2009	Summer offshore	164	SEA RAVEN	0.1184
2010	Summer offshore	164	SEA RAVEN	0.1192
2011	Summer offshore	164	SEA RAVEN	0.0189
2012	Summer offshore	164	SEA RAVEN	0.047
2013	Summer offshore	164	SEA RAVEN	0.0364
2014	Summer offshore	164	SEA RAVEN	0.0139
2015	Summer offshore	164	SEA RAVEN	0.0295
2016	Summer offshore	164	SEA RAVEN	0
2017	Summer offshore	164	SEA RAVEN	0.0184
2003	Summer offshore	197	GOOSEFISH	7.7886
2004	Summer offshore	197	GOOSEFISH	4.4458
2005	Summer offshore	197	GOOSEFISH	7.2547
2006	Summer offshore	197	GOOSEFISH	6.5421
2007	Summer offshore	197	GOOSEFISH	4.0966
2008	Summer offshore	197	GOOSEFISH	3.7944
2009	Summer offshore	197	GOOSEFISH	3.2076
2010	Summer offshore	197	GOOSEFISH	2.7587
2011	Summer offshore	197	GOOSEFISH	2.6624
2012	Summer offshore	197	GOOSEFISH	3.1404
2013	Summer offshore	197	GOOSEFISH	4.0699
2014	Summer offshore	197	GOOSEFISH	3.306
2015	Summer offshore	197	GOOSEFISH	1.4522
2016	Summer offshore	197	GOOSEFISH	5.0142
2017	Summer offshore	197	GOOSEFISH	4.7789
2003	Summer offshore	503	LONGFIN SQUID	0
2004	Summer offshore	503	LONGFIN SQUID	0
2005	Summer offshore	503	LONGFIN SQUID	0
2006	Summer offshore	503	LONGFIN SQUID	0
2007	Summer offshore	503	LONGFIN SQUID	0.0069
2008	Summer offshore	503	LONGFIN SQUID	0.0032
2009	Summer offshore	503	LONGFIN SQUID	0
2010	Summer offshore	503	LONGFIN SQUID	0
2011	Summer offshore	503	LONGFIN SQUID	0
2012	Summer offshore	503	LONGFIN SQUID	0.0557
2013	Summer offshore	503	LONGFIN SQUID	0.0024
2014	Summer offshore	503	LONGFIN SQUID	0
2015	Summer offshore	503	LONGFIN SQUID	0
2016	Summer offshore	503	LONGFIN SQUID	0.0031
2017	Summer offshore	503	LONGFIN SQUID	0
